# Supplementary material
Source: PubMed Central journal article supplement (PMC8549492)
Supplement: NIHMS1748570-supplement-Supplement.pdf [file NIHMS1748570-supplement-Supplement.pdf]

*Supporting Information for*

**The Transition Metal-Catalyzed [ $\pi 2s + \pi 2s + \sigma 2s + \sigma 2s$ ] Pericyclic Reaction:  
Woodward–Hoffmann Rules, Aromaticity, and Electron Flow.**

Alexander Q. Cusumano,<sup>†</sup> William A. Goddard, III,<sup>\*,††</sup> and Brian M. Stoltz,<sup>\*,†</sup>

<sup>†</sup>*Warren and Katharine Schlinger Laboratory of Chemistry and Chemical Engineering, Division  
of Chemistry and Chemical Engineering, California Institute of Technology, Pasadena,  
California 91125, United States*

<sup>††</sup>*Materials and Process Simulation Center, Beckman Institute, California Institute of  
Technology, Pasadena, California 91125, United States.*

wag@caltech.edu

stoltz@caltech.edu

Table of Contents:

|                                                                                                        |    |
|--------------------------------------------------------------------------------------------------------|----|
| General Computational Details .....                                                                    | 2  |
| NEVPT2/CASSCF Active Spaces and Results .....                                                          | 3  |
| Additional Notes on CASSCF/NEVPT2 Calculations .....                                                   | 20 |
| Discussion on Other Main Group Chelelufuges .....                                                      | 20 |
| Exploring Exchange Coupling in Diradical 10 .....                                                      | 21 |
| Redox Innocence of the PHOX Ligand in the [ $\pi 2s + \pi 2s + \sigma 2s + \sigma 2s$ ] Reaction ..... | 25 |
| Nucleus Independent Chemical Shift Calculations .....                                                  | 27 |
| Intrinsic Bonding Orbital Analysis .....                                                               | 28 |
| Coordinates of Optimized Structures .....                                                              | 28 |
| References .....                                                                                       | 40 |

## General Computational Details

All quantum mechanical calculations were performed with ORCA version 4.1 and 4.2.<sup>1</sup> Geometries of open-shell species (**TS5**, **10**, and **TS6**) and their precursors (**3**, **4** and **5**) were optimized with complete active space self-consistent field (CASSCF) theory. The active space was defined as the correlating valence electrons and orbitals as obtained by the corresponding orbital correlation diagrams (see below). The triple  $\zeta$  quality def2-TZVP basis set<sup>2</sup> was used on all atoms. Further details on choice of active spaces are provided below. Results obtained via broken-symmetry density functional theory (BS-DFT) are provided below for comparison. For transition metal complexes with insignificant multiconfigurational character (**6**, **7**, **TS3**, **TS4**, **8**, and **9**), geometries were obtained from dispersion-corrected DFT. The PBE0 global hybrid density functional<sup>3</sup> paired with Becke–Johnson damped D3 dispersion corrections<sup>4</sup> (henceforth referred to as PBE0-D3(BJ)) and the def2-TZVP basis set on all atoms was employed. The small-core def2-ECP pseudopotential<sup>5</sup> was used on Pd – i.e. 18 explicit electrons including the 4s and 4p core shells were defined.

To account for dynamical correlation, N-electron valence state perturbation theory<sup>6</sup> (NEVPT2) single point calculations were carried out on all stationary points (CASSCF and DFT geometries) from the corresponding CAS references. The strongly contracted variant of NEVPT2 was employed. Control calculations with quasi-degenerate NEVPT2 (QD-NEVPT2)<sup>7</sup> provided indistinguishable results from that of the strongly contracted method. Thus, the inclusion of dynamical correlation did not significantly alter the CI coefficients of the CASSCF wavefunction for the states of interest. Solvation was accounted for in these single point calculations with the SMD model for THF.<sup>8</sup> In addition to single point calculations with NEVPT2/def2-TZVPP/SMD(THF), for the compounds that were optimized with PBE0-D3(BJ)/def2-TZVP, additional single point calculations were carried out with PBE0-D3(BJ)/def2-TZVP/SMD(THF) for comparison.

Thermal corrections were obtained from the unscaled vibrational frequencies computed at the level of theory employed for geometry optimization. The Quasi-RRHO method<sup>9</sup> was applied to correct for the breakdown of the harmonic oscillator approximation in low frequency vibrations. For CASSCF and DFT calculations these frequencies were computed numerically and analytically, respectively. All stationary points were characterized by the appropriate number of imaginary vibrational modes (zero for optimized geometries and one for transition states). Intrinsic reaction coordinate (IRC) analyses were carried out to ensure all transition states connect saddle points to the

appropriate minima. Conformer searching was carried out manually and energies reported are from lowest energy conformers. All energies reported in the manuscript are free energies calculated at 298.15 K and at a 1 atm standard state. Applying thermal corrections obtained at the optimization level of theory to the single point electronic energies (and solvation free energies), final Gibbs free energies are accordingly:

$$G_{\text{solv}} = E(\text{el})^{\text{SP}} + \text{ZPE} + E(\text{vib}) + E(\text{rot}) + E(\text{trans}) + k_{\text{b}}T - TS + \Delta G(\text{solv})^{\text{SP}}$$

The resolution of identity (RI) and chain-of-spheres<sup>10</sup> (keyword = RIJCOSX) approximations were utilized for coulomb and exchange integrals, respectively. Automatic generation of auxiliary basis sets was employed (keyword = AutoAux).<sup>11</sup> [Note that in geometry optimization, frequency, and IRC calculations with CASSCF, the RI and COS approximations were not used as they are not implemented with analytical (nuclear) gradients in ORCA version 4.2.0]. The finest integration grid settings (Grid7, GridX9, NoFinalGrid) were utilized in all calculations.

### NEVPT2/CASSCF Active Spaces and Results

Unless otherwise specified, energies provided below are solvated CASSCF and NEVPT2 free energies (in Hartree) with the def2-TZVP basis set and SMD implicit solvation model for THF. Energies further refined with the def2-TZVPP basis set are provided in the text and supporting excel document (nearly identical results were obtained). Weights ( $C_i^2$ ) of the three configurations with the largest contributions to the ground state CI coefficient vector are provided. The notation [2200] corresponds to a configuration with double occupancy of the first and second MOs of the active space and zero occupancy of the third and fourth active space MOs. Unless otherwise noted, active space MOs are depicted as the natural orbitals of the CAS wavefunction and are rendered with a contour value of 0.07. Active spaces were chosen to include the correlating valence orbitals as determined by the corresponding Woodward–Hoffmann orbital correlation diagrams.<sup>12</sup> The active space may be localized to confirm the correct active space compositions. Unless otherwise specified, state-averaging was not employed, and results are that of the lowest energy singlet state. Occupancy numbers are provided in parentheses next to MO numbers. Orbital energy eigenvalues (from NEVPT2) are listed when the ordering of the active space MOs by occupancy number is different than the ordering by energies.

Complex 1:

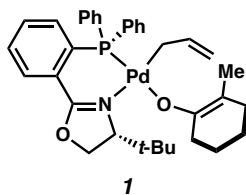

| CASSCF(8,8) | -2022.394386  |
|-------------|---------------|
| NEVPT2(8,8) | -2030.146571  |
| Weight      | Configuration |
| 0.87749     | [22220000]    |
| 0.02871     | [21211010]    |
| 0.02357     | [22020200]    |

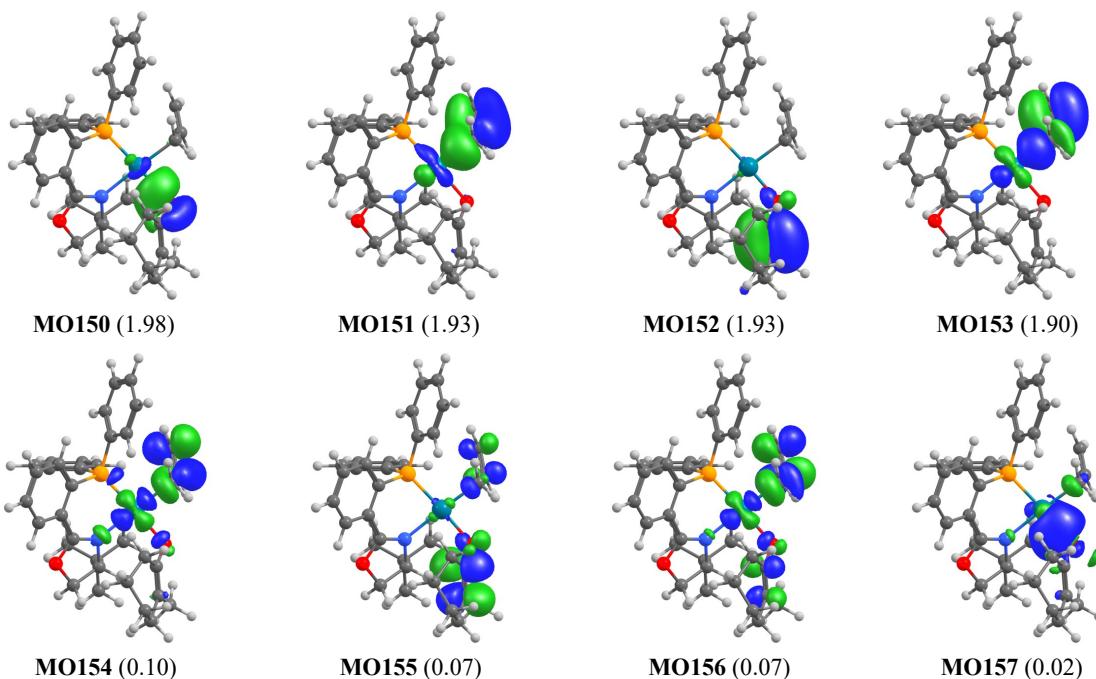

**Figure S1.** Geometry taken from reference 13 (BP86-D3/LANL2TZ(f)[Pd],6-31G(d)). Energies above are CASSCF and NEVPT2 solvated electronic energies in Hartree. Orbital energy eigenvalues (by ascending MO) in eV:  $-0.5516$ ,  $-0.4294$ ,  $-0.2868$ ,  $-0.3067$ ,  $0.1907$ ,  $0.3014$ ,  $0.3116$ ,  $0.9729$ . Isosurface level adjusted to 0.03 for ease of visualization.

Transition state **TS1**:

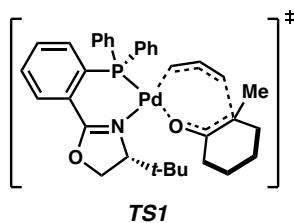

| CASSCF(8,8) | -2022.358794  |
|-------------|---------------|
| NEVPT2(8,8) | -2030.135158  |
| Weight      | Configuration |
| 0.85071     | [22220000]    |
| 0.03808     | [22202000]    |
| 0.00849     | [22111100]    |

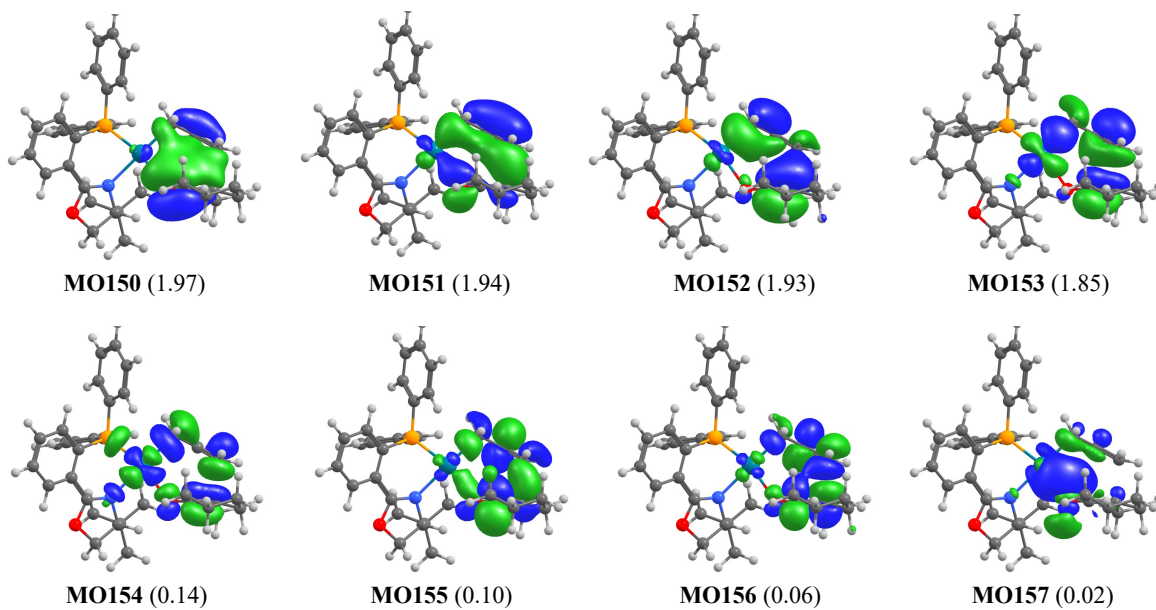

**Figure S2.** Geometry taken from reference 13 (BP86-D3/LANL2TZ(f)[Pd],6-31G(d)). Energies above are CASSCF and NEVPT2 solvated electronic energies in Hartree. Orbital energy eigenvalues (by ascending MO) in eV:  $-0.5101$ ,  $-0.4084$ ,  $-0.3196$ ,  $-0.2322$ ,  $0.1617$ ,  $0.2167$ ,  $0.3781$ ,  $0.7215$ . Isosurface level adjusted to 0.04 for ease of visualization.

## Complex 2:

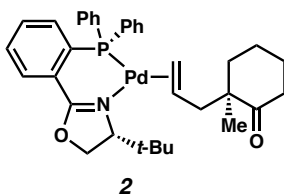

| CASSCF(8,8) | -2022.420396  |
|-------------|---------------|
| NEVPT2(8,8) | -2030.191318  |
| Weight      | Configuration |
| 0.90785     | [22220000]    |
| 0.02896     | [22020200]    |
| 0.02830     | [22202000]    |

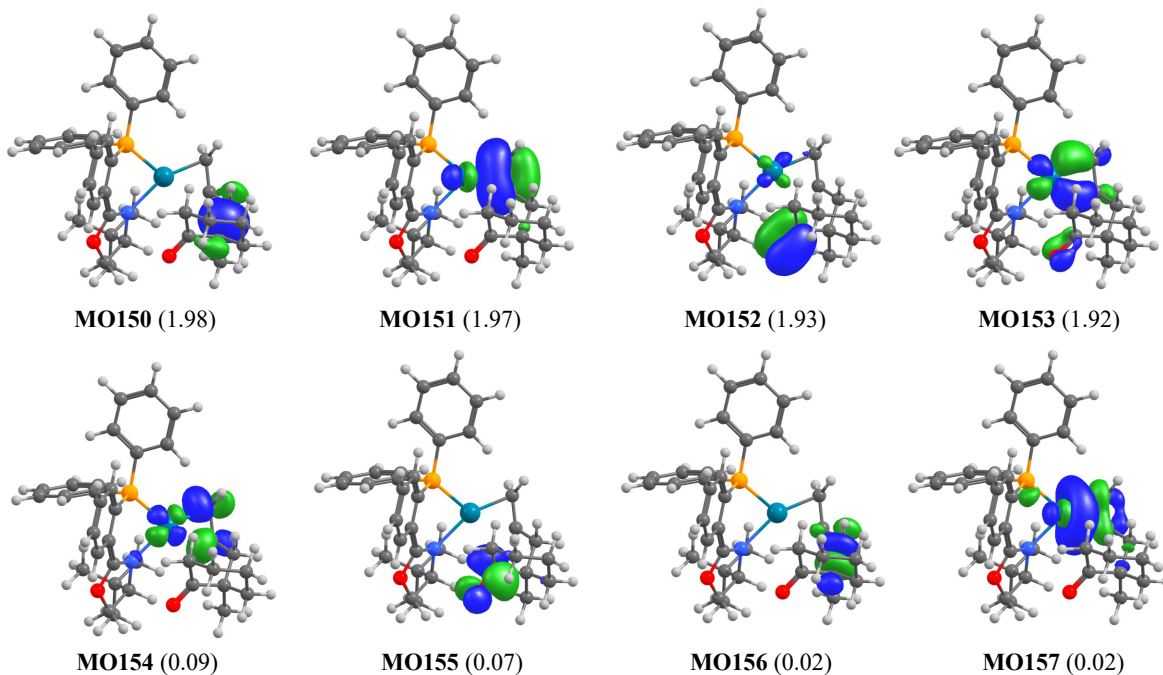

**Figure S3.** Geometry taken from reference 13 (BP86-D3/LANL2TZ(f)[Pd],6-31G(d)). Energies above are CASSCF and NEVPT2 solvated electronic energies in Hartree. Orbital energy eigenvalues (by ascending MO) in eV:  $-0.6097$ ,  $-0.4323$ ,  $-0.4795$ ,  $-0.3032$ ,  $0.2540$ ,  $0.2951$ ,  $0.7745$ ,  $0.5139$ . Isosurface level adjusted to 0.04 for ease of visualization.

Diallyl sulfone **3**: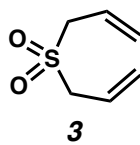

| CASSCF(8,8) | -780.349971   |
|-------------|---------------|
| NEVPT2(8,8) | -782.106985   |
| Weight      | Configuration |
| 0.90106     | [22220000]    |
| 0.03843     | [22111100]    |
| 0.01005     | [22202000]    |

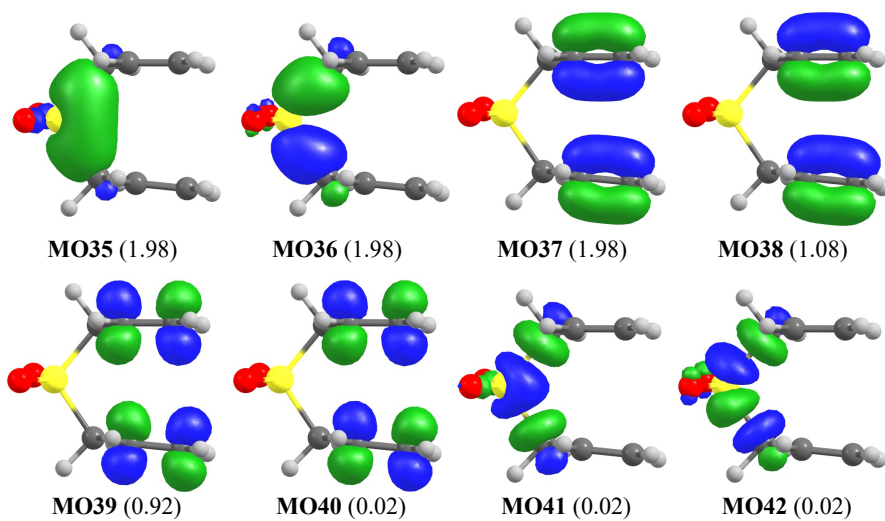

Figure S4. Active space orbitals for compound **3**.

Transition state **TS5**:

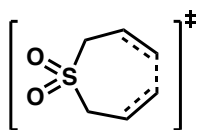

**TS5**

| CASSCF(8,8) | -780.258382   |
|-------------|---------------|
| NEVPT2(8,8) | -782.031183   |
| Weight      | Configuration |
| 0.68584     | [22220000]    |
| 0.26002     | [22202000]    |
| 0.01996     | [22111100]    |

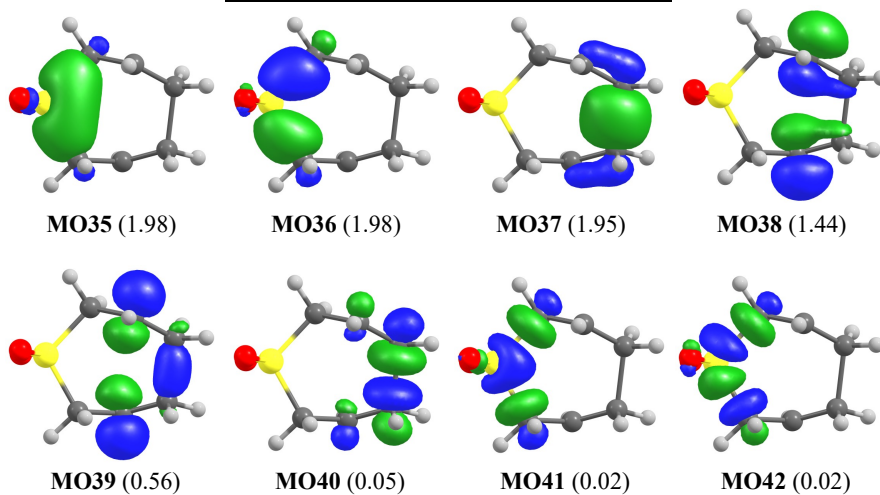

**Figure S5.** Active space orbitals for compound **TS5**.



Diradical **10**: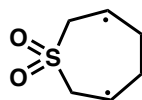**10**

| CASSCF(8,8) | -780.261600   |
|-------------|---------------|
| NEVPT2(8,8) | -782.026896   |
| Weight      | Configuration |
| 0.52173     | [22220000]    |
| 0.44492     | [22202000]    |
| 0.00405     | [12120101]    |

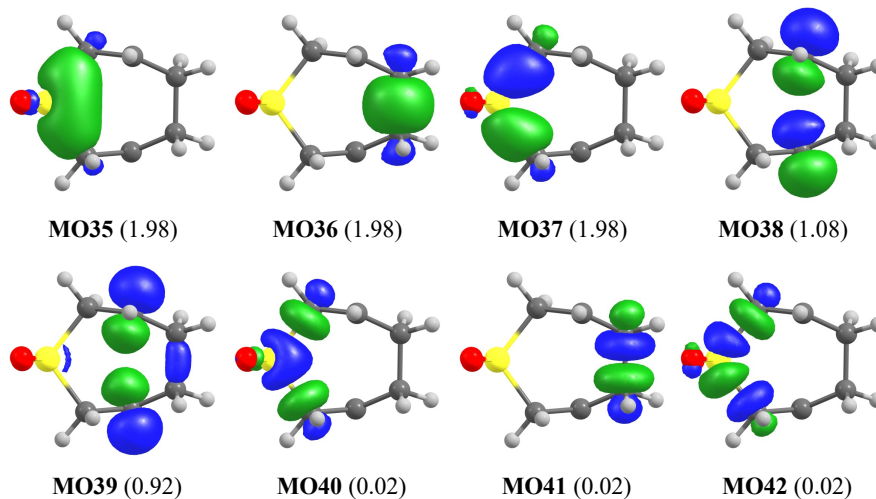**Figure S6.** Active space orbitals for compound **10**.

Transition state **TS6**:

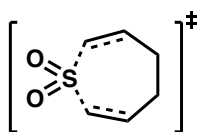

**TS6**

| CASSCF(8,8) | -780.244658   |
|-------------|---------------|
| NEVPT2(8,8) | -782.024561   |
| Weight      | Configuration |
| 0.61644     | [22220000]    |
| 0.29502     | [22202000]    |
| 0.04355     | [22111100]    |

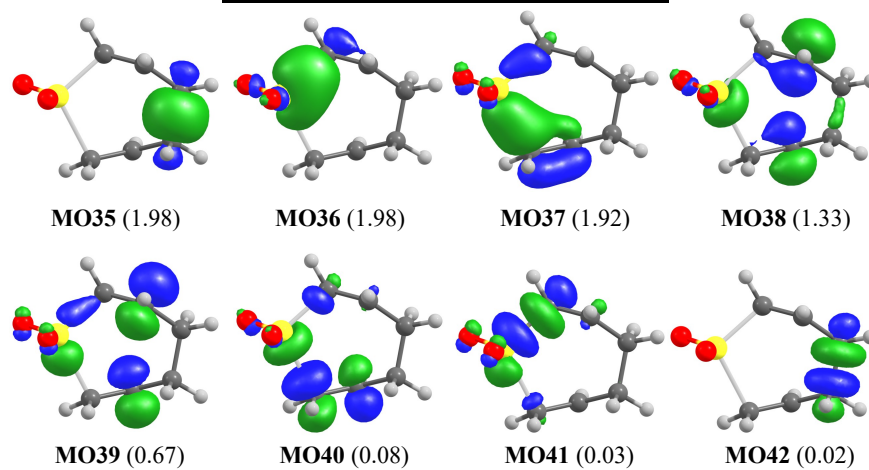

**Figure S7.** Active space orbitals for compound **TS6**.

SO<sub>2</sub> 4: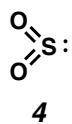

| CASSCF(2,2) | -547.345604   |
|-------------|---------------|
| NEVPT2(2,2) | -548.090971   |
| Weight      | Configuration |
| 0.98002     | [20]          |
| 0.01998     | [02]          |

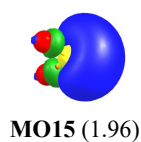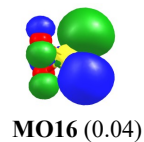

**Figure S8.** Active space orbitals for compound 4.

(s-cis)-1,5-hexadiene **5**: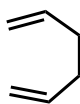**5\_cis**

| CASSCF(6,6) | -233.022382   |
|-------------|---------------|
| NEVPT2(6,6) | -234.026032   |
| Weight      | Configuration |
| 0.91161     | [222000]      |
| 0.03853     | [211110]      |
| 0.01066     | [220200]      |

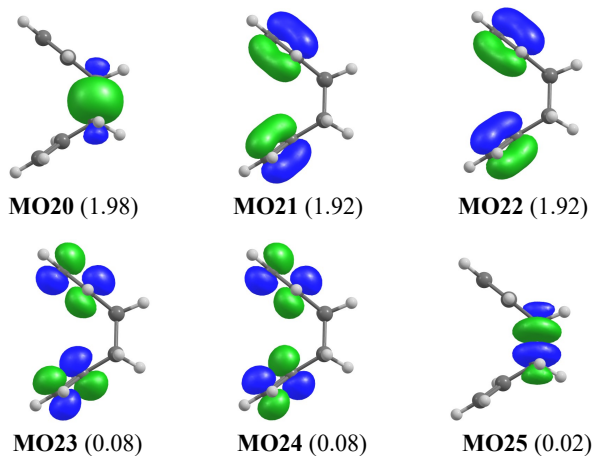

**Figure S9.** Active space orbitals for compound **5**. (Not visible at isosurface printed above: MO23 and MO24 experience slight mixing with MO25 and MO20, respectively, such that the resulting orbital energy eigenvalue for MO23 is lower than that of the symmetric MO24 (0.2332 eV and 0.2374 eV).

(s-trans)-1,5-hexadiene **5\_trans**:

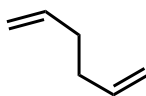

**5\_trans**

| CASSCF(6,6) | -233.004232   |
|-------------|---------------|
| NEVPT2(6,6) | -234.022461   |
| Weight      | Configuration |
| 0.92057     | [222000]      |
| 0.03724     | [211110]      |
| 0.00985     | [202200]      |

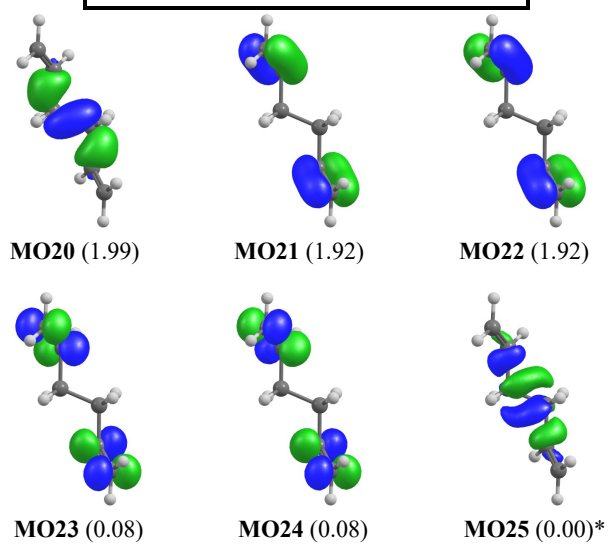

**Figure S10.** Active space orbitals for compound **5\_trans**. \*Occupancy 0.00465

Complex 6:

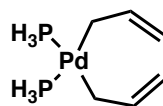

6

| CASSCF(8,8) | -1044.976965  |
|-------------|---------------|
| NEVPT2(8,8) | -1047.103294  |
| Weight      | Configuration |
| 0.88527     | [22220000]    |
| 0.01649     | [22111100]    |
| 0.01002     | [21211010]    |

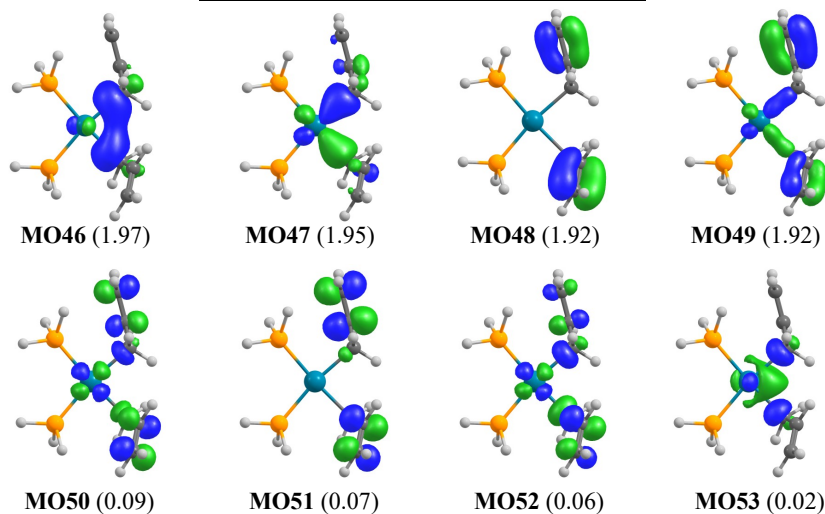

**Figure S11.** Active space orbitals for compound 6. *Orbital energy eigenvalues (by ascending MO) in eV: – 0.4110, –0.4486, –0.3197, –0.3230, 0.1931, 0.2702, 0.3169, 0.6241.* In this conformation, the antisymmetric Pd–L  $\sigma^*$  and the antisymmetric C–C  $\pi^*$  symmetry adapted linear combinations mix to give rise to MO50 and MO52.

Complex 7:

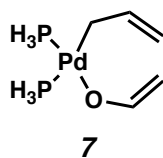

| CASSCF(8,8) | -1080.874182  |
|-------------|---------------|
| NEVPT2(8,8) | -1083.041153  |
| Weight      | Configuration |
| 0.88716     | [22220000]    |
| 0.03125     | [22111100]    |
| 0.02575     | [20220020]    |

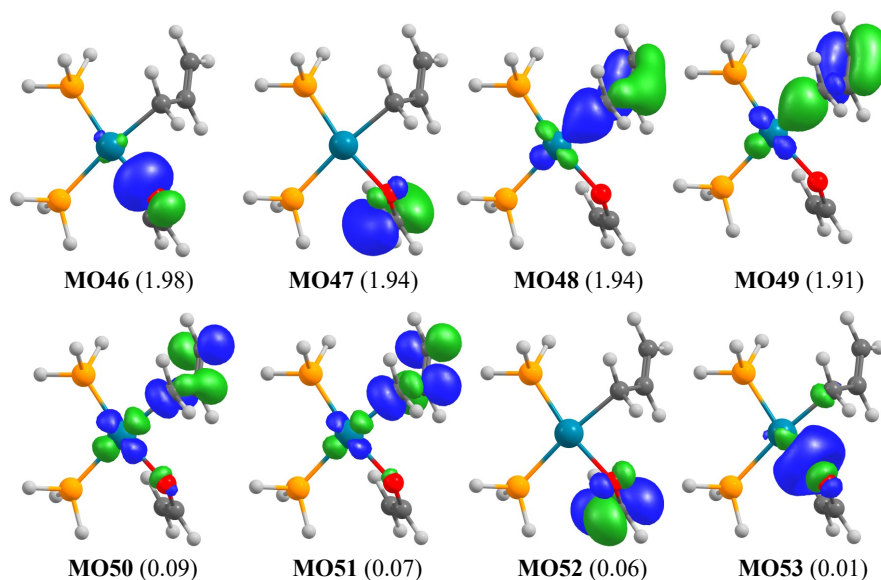

**Figure S12.** Active space orbitals for compound 7. *Orbital energy eigenvalues (by ascending MO) in eV:*  $-0.5622, -0.3144, -0.4403, -0.3213, 0.1826, 0.2975, 0.2983, 0.9742$ . In this conformation, the  $n^1$ -allyl ligand C–C  $p$  orbitals are nearly coplanar and further mix with the Pd-based  $d_{x^2-y^2}$  (MO48–MO51). If the active space is localized (Foster–Boys) the C–C  $\pi/\pi^*$  and Pd–C  $\sigma/\sigma^*$  may be separated for ease of interpretation.

Transition state **TS3**:

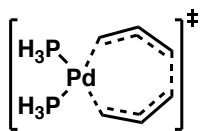

**TS3**

| CASSCF(8,8) | -1044.936576  |
|-------------|---------------|
| NEVPT2(8,8) | -1047.082378  |
| Weight      | Configuration |
| 0.85693     | [22220000]    |
| 0.01682     | [22202000]    |
| 0.01094     | [22111100]    |

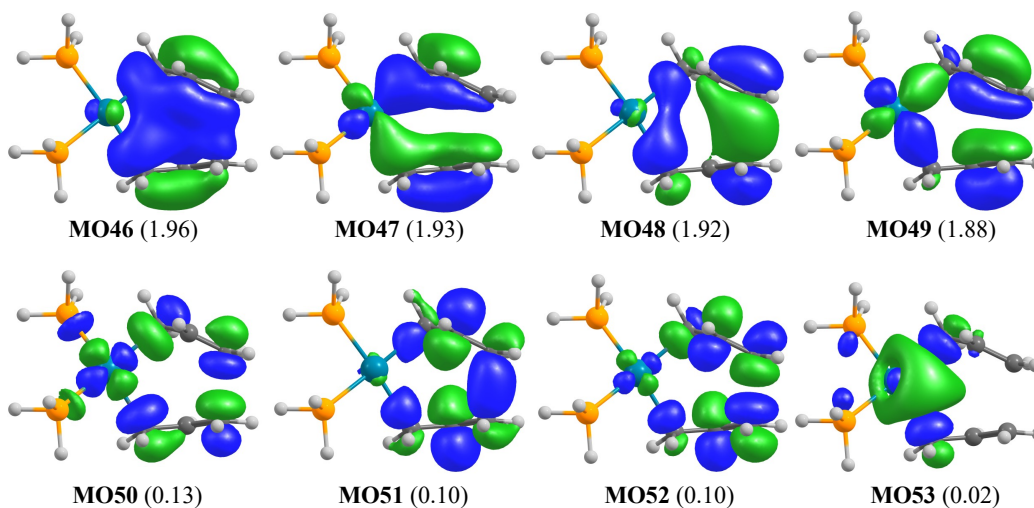

**Figure S13.** Active space orbitals for compound **TS3**. *Isosurface value adjusted to 0.04 for ease of visualization. Orbital energy eigenvalues (by ascending MO) in eV: -0.4443, -0.4016, -0.3064, -0.2400, 0.1574, 0.2046, 0.3684, 0.5126.*



Transition state **TS4**:

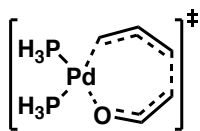

**TS4**

| CASSCF(8,8) | -1080.838314  |
|-------------|---------------|
| NEVPT2(8,8) | -1083.018807  |
| Weight      | Configuration |
| 0.86058     | [22220000]    |
| 0.03715     | [22202000]    |
| 0.00724     | [22020200]    |

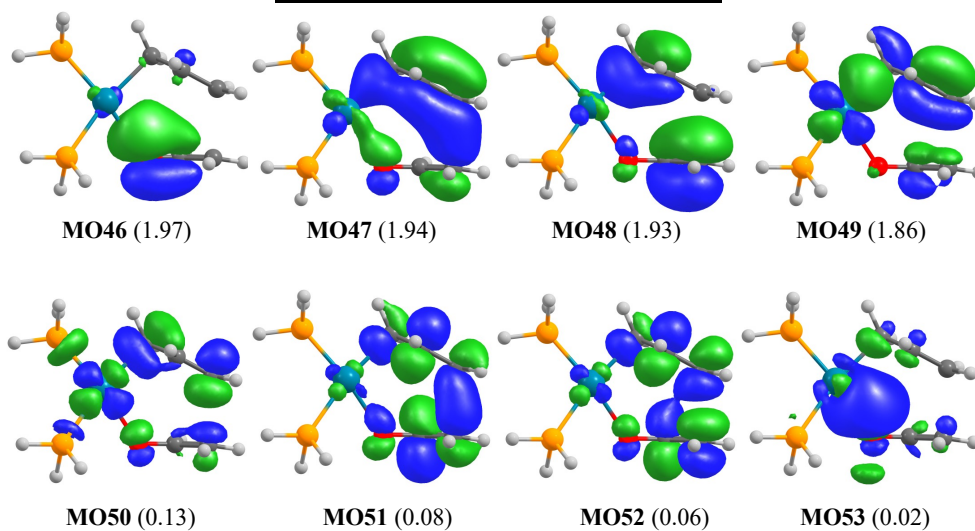

**Figure S14.** Active space orbitals for compound **TS4**. *Isosurface value adjusted to 0.04 for ease of visualization. Orbital energy eigenvalues (by ascending MO) in eV: -0.5448, -0.4209, -0.3126, -0.2783, 0.1404, 0.2406, 0.3519, 0.7700.*

Complex **8**: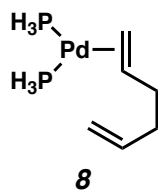

| CASSCF(8,8) | -1045.009114  |
|-------------|---------------|
| NEVPT2(8,8) | -1047.148494  |
| Weight      | Configuration |
| 0.88527     | [22220000]    |
| 0.01649     | [22111100]    |
| 0.01002     | [21211010]    |

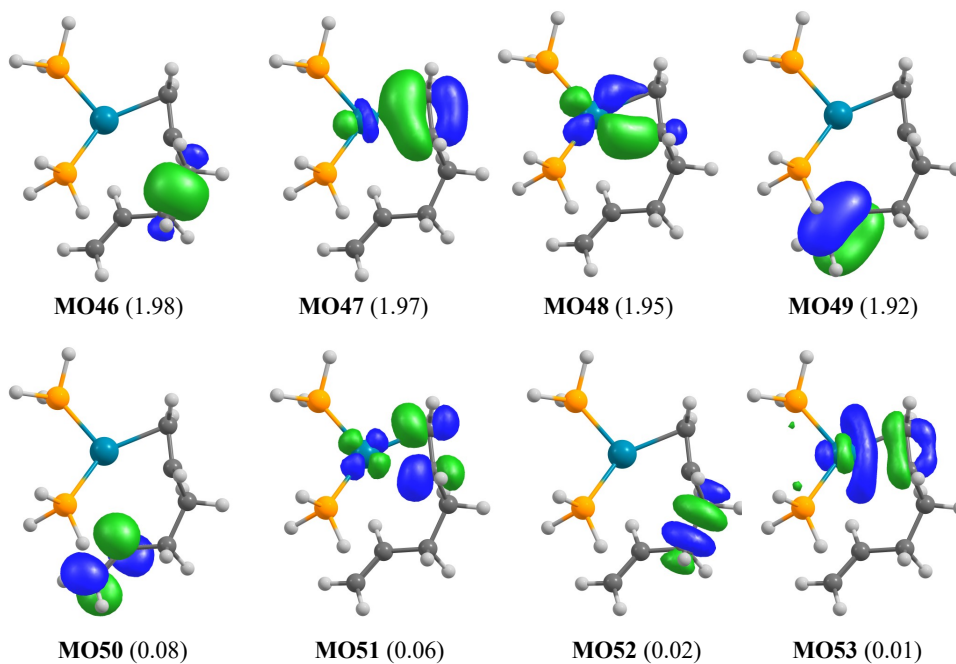

**Figure S15.** Active space orbitals for compound **8**. *Isosurface value adjusted to 0.04 for ease of visualization. Orbital energy eigenvalues (by ascending MO) in eV: -0.6193, -0.4392, -0.3288, -0.3509, 0.2247, 0.2579, 0.8061, 0.4683.*

Complex 9:

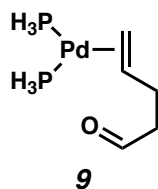

| CASSCF(8,8) | -1080.909107  |
|-------------|---------------|
| NEVPT2(8,8) | -1083.101216  |
| Weight      | Configuration |
| 0.92253     | [22220000]    |
| 0.02687     | [22202000]    |
| 0.01400     | [22020200]    |

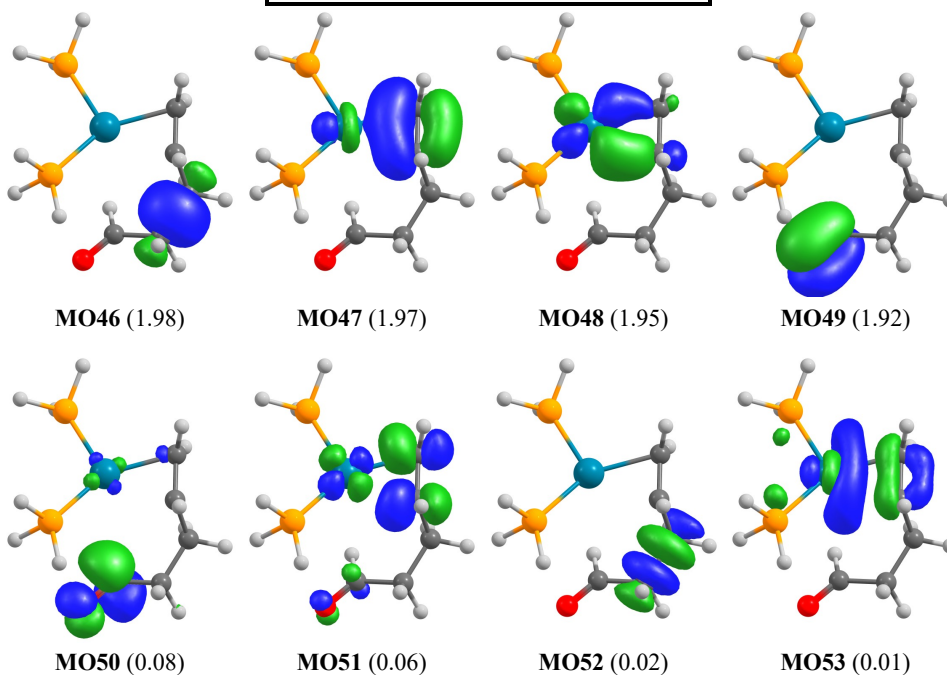

**Figure S16.** Active space orbitals for compound **9**. *Isosurface value adjusted to 0.06 for ease of visualization. Orbital energy eigenvalues (by ascending MO) in eV: -0.6342, -0.4444, -0.3324, -0.5055, 0.2854, 0.2572, 0.8066, 0.4687.*

### Additional Notes on CASSCF/NEVPT2 Calculations

The frozen core approximation was not used in the NEVPT2 calculations (keyword: “!NoFrozenCore”). Solvated free energies include the cavitation, dispersion, structure (CDS) terms as calculated in the SMD model.<sup>8</sup>

*Practical note to users:* For efficiently converging active spaces with weakly correlated valence-bond-like orbitals (such as the C–C( $\sigma/\sigma^*$ ) in the starting complexes and products), we recommend use of the PMO virtual orbital optimization feature in ORCA. A standard procedure involved converging the MCSCF with an active space excluding the weakly correlating pair, localization of the internal space, locating the valence bond orbital of interest, then optimization of a corresponding virtual orbital (using the PMO methodology (RefMO)). Generally, expanding the active space to include the natural orbital-like pair affords smoothly convergence of the MCSCF.

### Discussion on Other Main Group Chelefuges

In our investigation of the  $[\pi 2s + \pi 2s + \sigma 2s + \sigma 2s]$  reaction, we employ diallyl sulfone (**3**) as a main group analog to bis( $\eta^1$ -allyl)Pd(PH<sub>3</sub>)<sub>2</sub> complex **6**. In addition to SO<sub>2</sub>, CO and N<sub>2</sub> are also viable main group chelefuges. Thus, the  $[\pi 2s + \pi 2s + \sigma 2s + \sigma 2s]$  reactions of hepta-1,6-dien-4-one or diallyl isodiazene may be considered. For these scenarios, there are *nine* correlating valence orbitals – occupied by 10 valence electrons (see Chapter 3 of reference 12). Both reactions are similarly symmetry forbidden. As a representative example, the orbital correlation diagram for the reaction of hepta-1,6-dien-4-one to CO and 1,5-hexadiene is provided below (Figure S17). In the general  $[\pi 2s + \pi 2s + \sigma 2s + \sigma 2a]$  reaction, we only consider linear departure/approach of the chelefuge due to the geometric/steric constraints of the seven-membered transition state. An exception to this may be methylene carbene, which could possibly undergo the thermally allowed  $[\pi 2s + \pi 2s + \sigma 2s + \sigma 2a]/[\omega 2a + \pi 2s + \pi 2s + \sigma 2s]$  reaction, i.e. with non-linear departure/approach of the carbene.

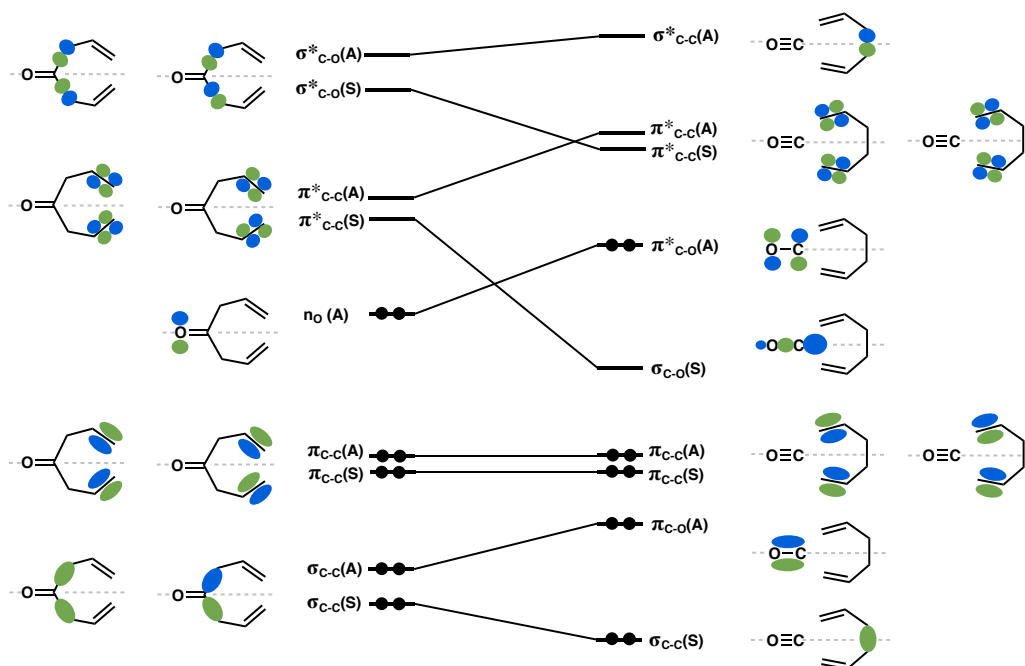

**Figure S17.** Orbital correlation diagram for the ground state symmetry-forbidden  $[\pi 2s + \pi 2s + \sigma 2s + \sigma 2s]$  extrusion of CO from hepta-1,6-dien-4-one.

### Exploring Exchange Coupling in Diradical **10**

The RI and COS integral approximations were not used in calculations evaluating exchange coupling. All computations were carried out in the gas phase. State averaging over the relevant singlet and triplet diradical states was employed in CASSCF calculations. Results obtained with the minimal (2,2) active space, i.e. including only the local spin centers, are provided for comparison. Hypothetical diradical species **10** is a metastable intermediate on the singlet CAS(8,8) and BS-DFT ( $M_s = 0$ ) potential energy surfaces. In the case of BS-DFT, the diradical was found as an intermediate regardless of choice of functional ((U)PBE0-D3(BJ), (U)PBE-D3(BJ), (U)M06-2X).<sup>14</sup>

Exchange coupling interaction may be described through the phenomenological Heisenberg–Dirac–van Vleck Hamiltonian<sup>15</sup>:

$$\hat{H}_{\text{HDvV}} = -2J\hat{S}_A\hat{S}_B$$

where  $\hat{S}_A$  and  $\hat{S}_B$  are “local” spin operators on spin sites *A* and *B*. *J* is defined as the exchange coupling constant. Thus, for the coupling of two spin-1/2 magnetic sites, *J* is expressed as:

$$J = -\frac{1}{2}(E_T - E_S)$$

where  $E_T$  and  $E_S$  are the energies of the triplet- and singlet-coupled diradical states, respectively. When  $J > 0$ , i.e.  $E_T < E_S$ , the interaction is termed ferromagnetic. Likewise,  $J < 0$  implies an antiferromagnetic coupling of the two spins. As a consequence of a single determinant formulation, the broken-symmetry DFT solution of an open-shelled singlet state is a mixture of the  $M_S = 0$  singlet and triplet states.<sup>16</sup> Thus, calculation of exchange coupling was performed after removal of spin contamination. The spin projection to the “true” singlet energy was carried out via the Yamaguchi equation<sup>17</sup>:

$$E_T - E_S = \frac{2}{\langle S^2 \rangle_T - \langle S^2 \rangle_{BS}} (E_T - E_{BS})$$

As such, the  $J$  values we report via BS-DFT are calculated as:

$$J = -\frac{E_T - E_{BS}}{\langle S^2 \rangle_T - \langle S^2 \rangle_{BS}}$$

Single point calculations with SA-CAS(8,8) on the CAS(8,8) PES initially suggest an antiferromagnetic coupling between the two spin-1/2 centers ( $J = -12.1 \text{ cm}^{-1}$ ) of **10**. However, inclusion of dynamical correlation via SC-NEVPT2, with the SA-CAS(8,8) reference, reveals a weak ferromagnetic coupling ( $J = 3.2 \text{ cm}^{-1}$ ) (Table 1, entry 5). BS-DFT single point calculations carried out on the CAS(8,8) geometry also suggest a singlet-coupled diradical, with  $J = -38.9 \text{ cm}^{-1}$ . Conversely, DFT single point calculations at both the high spin and broken-symmetry (BS-)DFT-optimized geometries suggest ferromagnetism (Table S1, entries 9 and 10). Unsurprisingly, these data suggest the treatment of dynamical electron correlation is crucial in obtaining qualitatively meaningful results.

**Table S1. Calculation of spin exchange coupling constant ( $J$ ) between spin centers in 1,4-diradical **10**.<sup>a</sup>**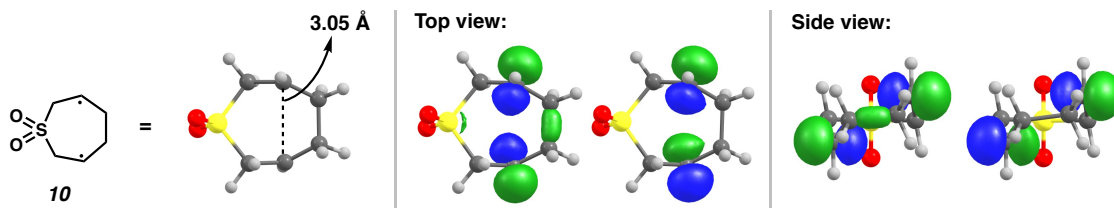

| Entry No. | Method                      | $J$ (cm <sup>-1</sup> ) |
|-----------|-----------------------------|-------------------------|
| 1         | SA-CAS(2,2)                 | 59.1                    |
| 2         | SA-CAS(8,8)                 | -12.1                   |
| 3         | SC-NEVPT2/SA-CAS(2,2)       | -14.1                   |
| 4         | FIC-NEVPT2/SA-CAS(2,2)      | -14.0                   |
| 5         | SC-NEVPT2/SA-CAS(8,8)       | 3.2                     |
| 6         | FIC-NEVPT2/SA-CAS(8,8)      | 7.0                     |
| 7         | <b>IDDCI<sup>b</sup></b>    | <b>82.9</b>             |
| 8         | (U)PBE0-D3(BJ) <sup>c</sup> | -38.9                   |
| 9         | (U)PBE0-D3(BJ) <sup>d</sup> | 30.0                    |
| 10        | (U)PBE0-D3(BJ) <sup>e</sup> | 37.0                    |

<sup>a</sup> Unless otherwise noted, performed on the singlet CAS(8,8)/def2-TZVP geometry **10**. All calculations above employ the def2-TZVP basis set on all atoms, no integral approximations, and are carried out in the gas phase. Pictured above are the two natural orbitals in the CAS(8,8) active space describing bonding and antibonding pairing in diradical **10**. <sup>b</sup> IDDCI (see below) starting from the SA-CAS(2,2) wavefunction. <sup>c</sup> BS-DFT single point calculation on CAS(8,8)/def2-TZVP geometry. <sup>d</sup> Single point calculation on broken-symmetry ( $M_s = 0$ ) (U)PBE0-D3(BJ)/def2-TZVP optimized geometry. <sup>e</sup> Single point calculation on high spin ( $S = 1$ ) (U)PBE0-D3(BJ)/def2-TZVP optimized geometry.

For a more rigorous treatment of static and dynamic correlation, multireference calculations were carried out with the Iterative Difference Dedicated Configuration Interaction (IDDCI) method.<sup>18</sup> The standard DDCI approach resembles that of an uncontracted MRCI (singles and doubles), where completely inactive double excitations are omitted. The reference states were defined to be the singlet and triplet diradical states. The state-averaged CAS(2,2) wavefunction was taken to be the initial orbitals. The results obtained with DDCI are highly dependent on the choice of reference orbitals. To help alleviate this starting orbital dependence and generally obtain more accurate results, we employed the Iterative DDCI method (IDDCI) of Malrieu and coworkers.<sup>11b</sup> In IDDCI, an iterative MO improvement strategy is utilized in which a DDCI calculation is first converged, followed by construction of the state-averaged single-particle density matrix and diagonalization to give a set of

new set of state-averaged natural orbital-like MOs. These MOs then serve as the starting orbital basis for a subsequent DDCI calculation. The process is repeated until self-consistency (i.e. the energies of the states stabilize).

As implemented in the ORCA program, convergence of the calculated exchange coupling constant and state energies is achieved with the parameters  $T_{\text{sel}} = 1 \times 10^{-11}$  (default  $1 \times 10^{-6}$ ) and  $T_{\text{pre}} = 1 \times 10^{-4}$  (default  $1 \times 10^{-4}$ ). A sample input for the IDDCI calculation is provided below:

```
! def2-TZVP NoPop Grid7 NoFinalGrid
! MORead VeryTightSCF NoIter AllowRHF

%base "SampleName"
%moinp "SampleStart.gbw"
%method
FrozenCore fc_ewin
end

%mrcki
  EWin -10,1000
  CIType MRDDCI3
  Solver DIIS
  UseIVOs true
  Tsel 1e-11
  Tpre 1e-5
  AllSingles true
  DavidsonOpt none
  NatOrbIters 5
  NewBlock 1 *
    NRoots 1
    refs cas(2,2) end
  end
  NewBlock 3 *
    NRoots 1
    refs cas(2,2) end
  end
end

* xyzfile 0 1 Sample.xyz
```

Due to the rapidly increase in computational cost with increase in the size of the active space, we elected to employ the (2,2) active space consisting of the two local magnetic orbitals. Calculations with the (8,8) active space were explored; however, it was found that convergence of the exchange coupling constant and state energies was not fully achieved with values of  $T_{\text{sel}}$  that yield a reasonable computational cost. Thus, we suggest the results obtained from the tightly converged (2,2) active space to be more robust. *Note that the results are qualitatively similar regardless – both (2,2) and (8,8) active spaces afford  $J > 0$ .* After five iterations, the IDDCI(2,2) method converges to an



exchange coupling constant of  $82.9 \text{ cm}^{-1}$  (Figure S18). These results are in accord with that of NEVPT2(8,8) and BS-DFT, suggesting a triplet ground state of diradical **10**.

In summary, the concerted ground state  $[\pi 2s + \pi 2s + \sigma 2s + \sigma 2s]$  reaction of diallyl sulfone **3** to  $\text{SO}_2$  (**4**) and 1,5-hexadiene (**5**) is symmetry forbidden. Owing to the triplet ground state of diradical **10**, the individual steps of the stepwise mechanism are formally spin forbidden — granted the singlet and triplet states are nearly degenerate ( $\Delta E_{T-S}$  of *ca.* 0.5 kcal/mol) in the weakly coupled diradical.

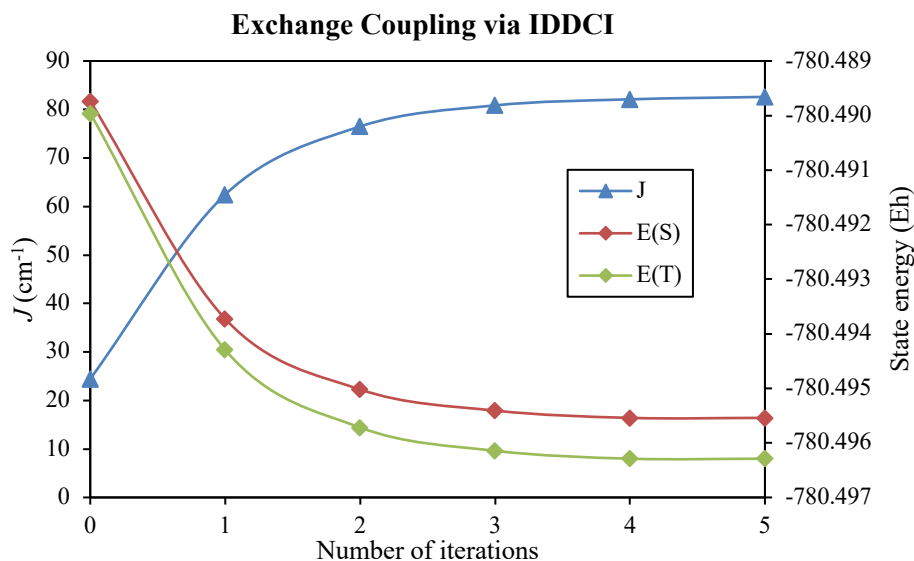

**Figure S18.** Convergence of exchange coupling and state energies via iterative MO optimization in DDCI (IDDCI).

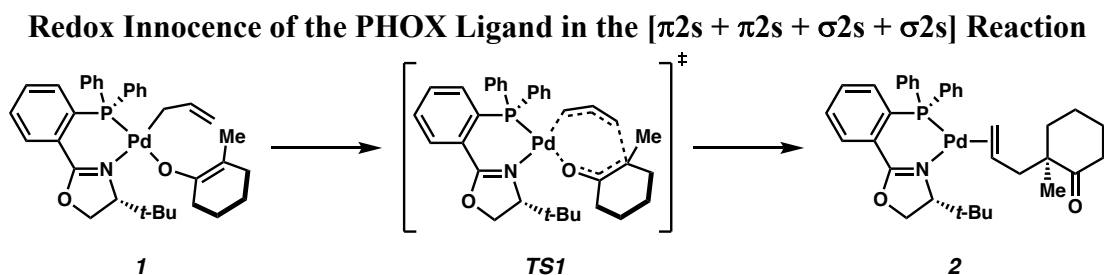

The general Pd-catalyzed  $[\pi 2s + \pi 2s + \sigma 2s + \sigma 2s]$  pericyclic reaction is symmetry allowed without mandatory implication of ligand-based excited states/configurations. However, in the case of Pd(PHOX) complexes, we sought to evaluate whether the  $\pi$  system of the PHOX ligand is capable of facilitating the reductive elimination through ligand-based redox activity. First, we note that the ground state densities obtained with PBE0-D3(BJ)/def2-TZVP are stable with respect to spin symmetry breaking. Thus, at the DFT level, the ground state along the reaction path **1**  $\rightarrow$  **TS1**  $\rightarrow$  **2** is

well represented as a closed-shell singlet (CSS). Time-dependent density functional theory (TD-DFT) calculations were then carried out on stationary points **1**, **TS1**, and **2** at the PBE0-D3(BJ)/def2-TZVP/SMD(THF) level of theory. The TD-DFT calculations suggest no low energy excited states along the ground state PES. The lowest of these vertical transitions is that of the  $^3(\text{M/L} \rightarrow \text{L})$  at **TS1**, which is calculated to be nearly 1.0 eV (Table S2). All other excitations ( $\text{M} \rightarrow \text{M}$ ,  $\text{L} \rightarrow \text{M/L}$ , etc.) are found to be  $> 2$  eV. The PHOX  $\pi^*$ -based LUMO (Figure S19) serves as a common acceptor in each of the lowest energy transitions in Table 2. These results suggest that redox contribution of the PHOX ligand along the ground state PES is likely trivial.

**Table S2. Lowest energy TD-DFT vertical excitations at stationary points 1, TS1, and 2.<sup>a</sup>**

|         | <b>1</b>          |             | <b>TS1</b>          |             | <b>2</b>   |             |
|---------|-------------------|-------------|---------------------|-------------|------------|-------------|
|         | Excitation        | Energy (eV) | Excitation          | Energy (eV) | Excitation | Energy (eV) |
| Singlet | L $\rightarrow$ L | 1.463       | M/L $\rightarrow$ L | 1.401       | MLCT       | 2.264       |
| Triplet | L $\rightarrow$ L | 1.014       | M/L $\rightarrow$ L | 0.986       | MLCT       | 1.941       |

<sup>a</sup> TD-DFT vertical excitations with PBE0-D3(BJ)/def2-TZVP/SMD(THF) and adapted triplets from the RKS reference. L = ligand, M = metal, M/L = mixed metal/ligand.

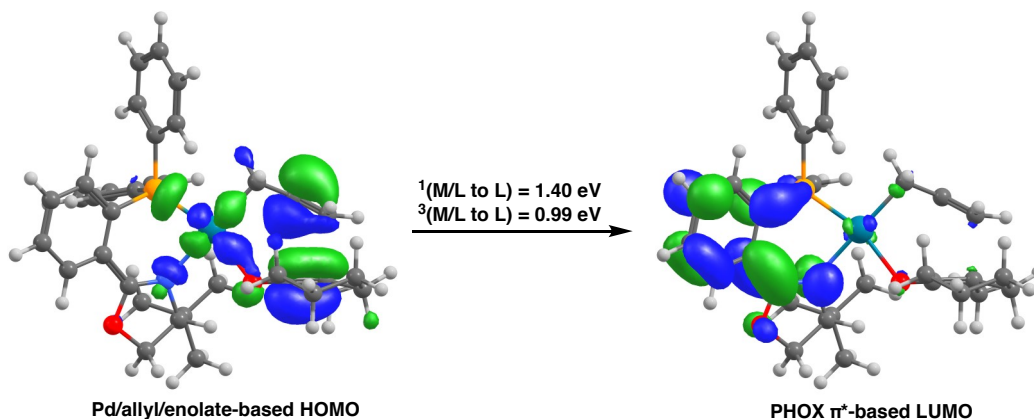

**Figure S19.** Orbitals involved in the vertical transitions to the lowest energy singlet and triplet excited states at **TS1**.

## Nucleus Independent Chemical Shift Calculations

Calculations of Nucleus Independent Chemical Shift (NICS) were carried out in order to probe the aromatic character of **TS3**. In this investigation, the formalism of Schleyer and coworkers is followed.<sup>19</sup> Reported NICS values are the negative of the calculated isotropic chemical shift/shielding at the geometric center of the ring in question. These calculations were carried out with the NMR module in ORCA. Calculations of NICS were conducted in the gas phase at the PBE0-D3(BJ)/def2-TZVP level of theory. Gauge independent atomic orbitals (GIAO) were used and the relevant one-electron and two-electron integrals were evaluated analytically and with the RIJK approximation, respectively. A ghost atom (“H:”, no nuclear charge nor electrons) was used to define a point in space at which shielding was to be determined. A highly contracted basis (and auxiliary basis) function was then assigned to the ghost atom. *This procedure was used to ensure the proper grid points were assigned to the point in space without significantly perturbing the ground state density. Note that the results are independent of the chosen exponent as long as the exponent is large.* For example, the following would be added to the geometry block of an input file to define a point with cartesian coordinates (0.0000, 1.0000, 2.0000):

```
H: 0.0000 1.0000 2.0000 newgto S 1 1 1000000 1 end newauxJKgto S 1 1 2000000 1 end
```

At the PBE0-D3(BJ)/def2-TZVP level of theory, NICS values of  $-8.9$  and  $28.8$  ppm were obtained for benzene and cyclobutadiene, respectively. These controls are in good agreement with literature values of  $-9.7$  and  $27.6$  ppm (HF/6-31+G(d)).<sup>19</sup> As described in the text, an NICS value of  $-19.4$  ppm is found at the geometric center of the seven-membered ring of **TS3** (Figure S20). A NICS value of  $-19.4$  ppm reveals a significant diatropic ring current. Thus, **TS3** is characterized as aromatic.<sup>19</sup>

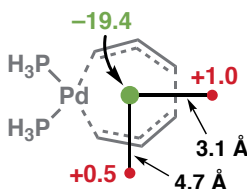

**Figure S20.** NICS calculated at various points along the plane in which the seven-membered ring of **TS3** resides.

### Intrinsic Bonding Orbital Analysis

Analysis of the net flow of electron density through the Pd-catalyzed [ $\pi 2s + \pi 2s + \sigma 2s + \sigma 2s$ ] pericyclic reaction was carried out by Intrinsic Bonding Orbital (IBO) analysis.<sup>20</sup> IBO analysis was carried out along the IRC describing **1**  $\rightarrow$  **TS1**  $\rightarrow$  **2**. SCF densities were obtained at the M06/def2-TZVP/CPCM(THF) level of theory and on BP86-D3(BJ)/LANL2TZ(f)[Pd]-6-31G(d) geometries, consistent with reference 13. Localization of the SCF density, frame alignment, and calculation of IBO displacement were carried out with the IBOView program.<sup>21</sup> For further details of this procedure and additional discussion of the relevant theory, see the seminal reports of Knizia and coworkers.<sup>20</sup> Note that results are largely independent of choice in density functional, and qualitatively identical results may be obtained with densities from an ab initio wavefunction method.

### Coordinates of Optimized Structures

**1** (from reference 13):

|    |                  |                   |                   |
|----|------------------|-------------------|-------------------|
| Pd | 3.26950843604510 | 9.76495175299426  | 21.00419457583790 |
| P  | 4.88760379688076 | 9.91056143608204  | 22.52617853020251 |
| O  | 1.76323089045818 | 9.85273395150916  | 19.56727544961257 |
| N  | 4.73672077332216 | 10.54415332504924 | 19.63123718078958 |
| C  | 5.66479716159015 | 11.58043266656630 | 22.37210655628401 |
| C  | 6.05286776841761 | 12.28298227144990 | 23.52750210444541 |
| H  | 5.88044346623243 | 11.82935278494911 | 24.50705137912432 |
| C  | 6.65502707296398 | 13.54760121695888 | 23.44624823669792 |
| H  | 6.94006550973100 | 14.07152046747479 | 24.36423644109913 |
| C  | 6.89414150294726 | 14.12910917932956 | 22.19424064883262 |
| H  | 7.36371961850387 | 15.11462856551206 | 22.11935991477293 |
| C  | 6.52949531405581 | 13.44156355992346 | 21.03130283255324 |
| H  | 6.71323922845150 | 13.87918586505401 | 20.04749317569378 |
| C  | 5.91009859557560 | 12.17592995841910 | 21.09953109400620 |
| C  | 4.49621148079386 | 9.76586128277550  | 24.30762889493065 |
| C  | 5.12573133223182 | 8.82710859888075  | 25.14580093157923 |
| C  | 3.45590693711213 | 10.57164900582749 | 24.82053068256393 |
| C  | 6.29779064189354 | 8.76383604753914  | 22.26744745932536 |
| C  | 8.66169191708101 | 8.28093487949923  | 21.95189129910073 |
| C  | 7.63576535709550 | 9.19902316151298  | 22.22341950025806 |
| H  | 7.87325732712447 | 10.25431421205814 | 22.38831736338143 |
| C  | 1.58241148549900 | 11.02631471877723 | 17.51134963414896 |
| C  | 1.47195730710228 | 12.31523694111276 | 16.72287231157369 |
| C  | 1.29849235553325 | 13.57134345806962 | 17.59270767032353 |

|   |                  |                   |                   |
|---|------------------|-------------------|-------------------|
| C | 2.20906744918311 | 13.50486731690466 | 18.82587500043443 |
| H | 3.26531289202085 | 13.40315993290202 | 18.50141914943214 |
| H | 2.14624966749978 | 14.43727428164700 | 19.41761424495447 |
| C | 1.82359468325013 | 12.29371346547166 | 19.68308398030360 |
| H | 2.55333448148556 | 12.13753501363801 | 20.50301557428847 |
| H | 0.84928814927450 | 12.47477558523721 | 20.18302482740430 |
| C | 1.73167499679114 | 11.00121732300634 | 18.87697298656825 |
| C | 1.49457185141478 | 9.75071568180307  | 16.71544060807573 |
| H | 0.49077882104206 | 9.61383527184904  | 16.26234797065140 |
| H | 1.69102250022378 | 8.87873312148177  | 17.35968880892329 |
| H | 2.21397743291877 | 9.74376290392780  | 15.86788628761892 |
| C | 1.82915786962066 | 8.93256276815405  | 22.23151323449021 |
| H | 1.89049733374997 | 9.30935738238343  | 23.26436409134669 |
| H | 0.90406472498266 | 9.25359705043085  | 21.72957898501449 |
| C | 2.09319963673235 | 7.48510683052055  | 22.12472463706674 |
| H | 1.83540561644794 | 7.02146901941782  | 21.16107947340613 |
| C | 2.64311364824027 | 6.70730064271308  | 23.09189653994621 |
| H | 2.90762680928226 | 7.12067097449099  | 24.07262177128419 |
| H | 2.82860859695204 | 5.63889024188339  | 22.93702542209656 |
| O | 6.19166281413700 | 12.01280597861536 | 18.71732308070533 |
| C | 5.56708897833342 | 11.52327859032996 | 19.82455615481979 |
| C | 4.79194013712495 | 10.14827787682043 | 18.20161644670126 |
| C | 5.57520241933480 | 11.32567497108784 | 17.57675632938724 |
| H | 4.91112467256001 | 12.05035377293644 | 17.07678738998792 |
| H | 6.39053679122207 | 11.03368849230939 | 16.89974947561382 |
| C | 5.41718257874618 | 8.73504315551870  | 18.00408414001768 |
| H | 3.75774421412525 | 10.13907926776809 | 17.82656552699593 |
| C | 6.85149092773487 | 8.67654479772681  | 18.55985242808422 |
| H | 7.27553757736611 | 7.66731714949206  | 18.41879125500943 |
| H | 6.86856743909342 | 8.89352007186076  | 19.63934909696724 |
| H | 7.52399822575393 | 9.39222980540689  | 18.05226449971651 |
| C | 4.53539314928156 | 7.69089676370638  | 18.71641267414561 |
| H | 4.94051312171359 | 6.67568683559995  | 18.55430069922119 |
| H | 3.49877988107736 | 7.72374371413501  | 18.34067483091555 |
| H | 4.49243137279576 | 7.87671477084974  | 19.80394619549529 |
| C | 5.41423826388735 | 8.42950294389303  | 16.49131592164270 |
| H | 6.06277712373666 | 9.11872092045825  | 15.92037980261030 |
| H | 4.39260016842658 | 8.49606540548781  | 16.07646930602692 |
| H | 5.78778750915385 | 7.40587407418682  | 16.31265593443035 |
| C | 5.99347087068581 | 7.40317047970344  | 22.05123957983136 |
| C | 7.02404105774907 | 6.49024883574242  | 21.79375551863943 |
| C | 8.35763202052763 | 6.92832633213497  | 21.73505992516174 |
| H | 9.70011731504658 | 8.62525648356685  | 21.90636810454922 |
| H | 9.15978327879321 | 6.21530764070771  | 21.51810133401737 |
| H | 4.94779772396009 | 7.07289497365211  | 22.09059722957732 |
| H | 6.78358388324544 | 5.43545451333298  | 21.62521701567122 |

|   |                  |                   |                   |
|---|------------------|-------------------|-------------------|
| C | 4.72030731309721 | 8.69788210776159  | 26.48339737109613 |
| C | 3.69435736062084 | 9.50787308352162  | 26.99208976486263 |
| C | 3.06644531886547 | 10.45020259861152 | 26.15949875396680 |
| H | 2.95495457680878 | 11.28867171860542 | 24.16056178932473 |
| H | 3.37889915788328 | 9.40295709349443  | 28.03517512713574 |
| H | 2.26100184380325 | 11.08007924779594 | 26.55059800289344 |
| H | 5.92701899392818 | 8.19644533883680  | 24.75026943723703 |
| H | 5.21028130174062 | 7.96150117146977  | 27.12877123500411 |
| H | 0.63043004853618 | 12.24663180626808 | 16.00089762427773 |
| H | 2.37806799098562 | 12.43371062029024 | 16.08235893827716 |
| H | 0.24775241185730 | 13.63629620569583 | 17.93689838934686 |
| H | 1.49649772850582 | 14.48135627543095 | 16.99591621019111 |

**TS1** (from reference 13):

|    |                   |                   |                   |
|----|-------------------|-------------------|-------------------|
| Pd | 3.84257460521667  | 10.46200030588772 | 20.67075436643298 |
| P  | 5.15074034163713  | 10.15540810514023 | 22.44989358148340 |
| O  | 3.10449122326373  | 11.10540713618474 | 18.73383187122506 |
| N  | 5.84104531506366  | 10.78626216728257 | 19.66415109109233 |
| C  | 6.40986318662365  | 11.49163600998721 | 22.59047962762167 |
| C  | 6.71682422964359  | 12.04545318851498 | 23.84936121116300 |
| H  | 6.20191758410556  | 11.66365854261842 | 24.73492008858182 |
| C  | 7.67509072661005  | 13.05776618909766 | 23.99055088860824 |
| H  | 7.89438558298250  | 13.46131444642498 | 24.98454035117295 |
| C  | 8.35744999100930  | 13.53799269390182 | 22.86256948398570 |
| H  | 9.11203179215067  | 14.32442565264521 | 22.96182636562786 |
| C  | 8.06577304234885  | 13.00824271948597 | 21.60222109516002 |
| H  | 8.58223739357375  | 13.37829443471840 | 20.71372535693700 |
| C  | 7.09404141793846  | 11.99557597485309 | 21.44104759074771 |
| C  | 4.47514479813729  | 10.01649408498777 | 24.14915082829500 |
| C  | 4.90739045080366  | 9.04920912519858  | 25.07773803637211 |
| C  | 3.44234466375550  | 10.90972550080610 | 24.50663230633511 |
| C  | 6.19029542302571  | 8.64574104111240  | 22.27853065557956 |
| C  | 8.32212207053690  | 7.46608060877630  | 22.31920856089274 |
| C  | 7.57839807602744  | 8.64027827139748  | 22.51455931926415 |
| H  | 8.07733357196175  | 9.55767031783308  | 22.84136153335676 |
| C  | 0.88636924621206  | 10.92433996852201 | 17.97358995934897 |
| C  | -0.35250497908573 | 11.67131799174944 | 17.49039565174745 |
| C  | -0.65337466383279 | 12.96706441495538 | 18.26385197996850 |
| C  | 0.61409879139738  | 13.81639296880220 | 18.43802216049653 |
| H  | 1.00255549452595  | 14.10471944398356 | 17.44117647855183 |
| H  | 0.38461961013094  | 14.75587126803808 | 18.97421913413459 |
| C  | 1.69022936022627  | 13.01569230648428 | 19.19003126954549 |
| H  | 2.65114576969032  | 13.55754838041684 | 19.24166668484575 |
| H  | 1.36966394196727  | 12.85589376641623 | 20.24273678516854 |
| C  | 1.95194401964328  | 11.65649774255665 | 18.56198722310843 |

|   |                   |                   |                   |
|---|-------------------|-------------------|-------------------|
| C | 1.24369971788827  | 9.68062124272109  | 17.18569062379161 |
| H | 0.34785135653868  | 9.06384708940188  | 16.98870009423725 |
| H | 1.97977754912762  | 9.07570288425797  | 17.73671398114214 |
| H | 1.68764089912940  | 9.94423269215636  | 16.20571411840790 |
| C | 1.97995551424616  | 9.99043034672134  | 21.56835818584344 |
| H | 2.27504508408442  | 9.33148410062073  | 22.39883360717235 |
| H | 1.57104379778184  | 10.94641581615323 | 21.94185872745719 |
| C | 1.20753320361223  | 9.36862043951070  | 20.53106867229126 |
| H | 1.43547267909753  | 8.32307376391354  | 20.28400190467620 |
| C | 0.22286470620963  | 10.03201990852669 | 19.77898145302082 |
| H | -0.20639528570615 | 10.94379297084639 | 20.21273301917761 |
| H | -0.49507347432973 | 9.42165325119865  | 19.21830890218480 |
| O | 7.70735402531856  | 11.95524235298889 | 19.11611308360739 |
| C | 6.82458843816749  | 11.52867208669833 | 20.07380180945096 |
| C | 6.00170237925380  | 10.55066214014787 | 18.21280281103999 |
| C | 7.15565812499212  | 11.51510437144334 | 17.83698124274905 |
| H | 6.80683245334326  | 12.41245487571676 | 17.29844119185316 |
| H | 7.97769986227431  | 11.04789514174991 | 17.27374738516654 |
| C | 6.25997159415831  | 9.04286903872788  | 17.90763591380394 |
| H | 5.05350058107962  | 10.84098597742140 | 17.73124894497424 |
| C | 7.49998144665082  | 8.53204749400017  | 18.66392303280958 |
| H | 7.67519822345439  | 7.46604056528939  | 18.43635155343050 |
| H | 7.36214836253402  | 8.62341059270417  | 19.75291686086506 |
| H | 8.41523401893656  | 9.08554073829311  | 18.38378840056377 |
| C | 5.01874592008928  | 8.23644334593780  | 18.33502313167518 |
| H | 5.17039827794867  | 7.16041938571676  | 18.13366252912862 |
| H | 4.12302877614314  | 8.57772334224015  | 17.78952498466234 |
| H | 4.81413185620666  | 8.36689778224057  | 19.41158947170407 |
| C | 6.45205590061290  | 8.88219978223940  | 16.38547314945966 |
| H | 7.35738938507715  | 9.39791225610909  | 16.01676639824987 |
| H | 5.58168142946780  | 9.27880830319676  | 15.83155730512140 |
| H | 6.55728026995629  | 7.81347868903979  | 16.12772874347014 |
| C | 5.55551924218644  | 7.45855655031138  | 21.85765497066307 |
| C | 6.29785227830335  | 6.28496713831961  | 21.67608903859047 |
| C | 7.68469808580988  | 6.28865019089804  | 21.89943948632574 |
| H | 9.40334170633804  | 7.47349295584421  | 22.49300312790627 |
| H | 8.26807865874872  | 5.37561151820832  | 21.74161781951342 |
| H | 4.47882059562402  | 7.47216971085428  | 21.65635776451643 |
| H | 5.79633528111831  | 5.37028095240347  | 21.34351483996044 |
| C | 4.32162749818138  | 8.98589598305703  | 26.35063244758296 |
| C | 3.30538648461203  | 9.88696100052709  | 26.70625692807196 |
| C | 2.86842497231517  | 10.85126943140725 | 25.78309331379914 |
| H | 3.09636306714269  | 11.64514044448267 | 23.77203228602484 |
| H | 2.84903740792217  | 9.83366078032276  | 27.70019750765648 |
| H | 2.06985055518909  | 11.54981724844311 | 26.05378061296737 |
| H | 5.70408672893973  | 8.35136333434521  | 24.80241273274088 |

|   |                   |                   |                   |
|---|-------------------|-------------------|-------------------|
| H | 4.66229480830661  | 8.23184365038084  | 27.06813086331798 |
| H | -1.22988158897917 | 10.99493691410892 | 17.52676898919124 |
| H | -0.21370820011031 | 11.91466999070673 | 16.41462979114665 |
| H | -1.05964475087292 | 12.72013348770468 | 19.26364707405090 |
| H | -1.44082198141107 | 13.53971118096474 | 17.73992763593413 |

2 (from reference 13):

|    |                  |                   |                   |
|----|------------------|-------------------|-------------------|
| Pd | 3.40892821984617 | 9.57548180994135  | 20.63708137423307 |
| P  | 4.84593533321281 | 9.79648201908891  | 22.39467584511297 |
| O  | 3.72121715500973 | 12.10929642182155 | 17.76164834581262 |
| N  | 5.19863442987848 | 10.22736089300746 | 19.45410200953097 |
| C  | 5.60750763629421 | 11.48086667325468 | 22.25115597994107 |
| C  | 5.69592805542466 | 12.32728514020735 | 23.37125677904141 |
| H  | 5.32772089945508 | 11.96915954521793 | 24.33629927115776 |
| C  | 6.24850212031137 | 13.61395298205514 | 23.27742444546726 |
| H  | 6.29458925032951 | 14.24978402392602 | 24.16778885514220 |
| C  | 6.74570177325324 | 14.07368666891647 | 22.05149476088817 |
| H  | 7.18524188860840 | 15.07248156009153 | 21.96753037224923 |
| C  | 6.67389926572365 | 13.24677006445060 | 20.92410559721537 |
| H  | 7.05018617831925 | 13.59074590141271 | 19.95801111939930 |
| C  | 6.09639667958848 | 11.96160478637347 | 20.99991108123387 |
| C  | 4.29513244063977 | 9.74735606637389  | 24.14941702044027 |
| C  | 5.14207640491821 | 9.40414709839555  | 25.22237129427582 |
| C  | 2.94700565201092 | 10.07018704440548 | 24.40379135034721 |
| C  | 6.33013870592848 | 8.70490264048157  | 22.41219925611539 |
| C  | 8.73168119807324 | 8.28782974203697  | 22.45055158685528 |
| C  | 7.65130966727384 | 9.18225825123993  | 22.51114826416465 |
| H  | 7.83483884037841 | 10.25512305831720 | 22.62467765182594 |
| C  | 1.39933668244652 | 11.51472730954684 | 18.13004322753791 |
| C  | 0.48499025360100 | 12.77550794929948 | 17.94808873920420 |
| C  | 0.42350108471802 | 13.67901939931408 | 19.19370299302099 |
| C  | 1.82642350144789 | 14.11638424814738 | 19.64954862904691 |
| H  | 2.26451189638659 | 14.78916718009596 | 18.88646478918058 |
| H  | 1.77194646060617 | 14.69352923408393 | 20.59046380508886 |
| C  | 2.77756911872315 | 12.90332008504502 | 19.82980940627712 |
| H  | 3.80816342495517 | 13.23311445389370 | 20.03229499853076 |
| H  | 2.45038247666115 | 12.26767578640207 | 20.67419431516601 |
| C  | 2.76140977289175 | 12.10160311216322 | 18.53758653275498 |
| C  | 1.52240375586956 | 10.76175437906711 | 16.79980764244113 |
| H  | 0.53039228107476 | 10.40472449743852 | 16.46973016897448 |
| H  | 2.18686008071839 | 9.88782162542038  | 16.90595243188864 |
| H  | 1.94802984330979 | 11.40849203966424 | 16.01581701515308 |
| C  | 1.46660664872501 | 8.85307474989263  | 20.92932340384906 |
| H  | 1.53083638359487 | 7.77645428264424  | 21.14017539338617 |
| H  | 0.88606648516123 | 9.41788749921577  | 21.67370453060018 |



|   |                   |                    |                   |
|---|-------------------|--------------------|-------------------|
| C | 1.52997925447675  | 9.33027251887933   | 19.58362570519831 |
| H | 1.64878434054261  | 8.59259858774980   | 18.77748582148616 |
| C | 0.77917867217335  | 10.59848756547767  | 19.21686884553761 |
| H | 0.62030860044023  | 11.17536312387277  | 20.14451125661726 |
| H | -0.23873947905966 | 10.33398893689353  | 18.85210778438655 |
| O | 6.87215517631868  | 11.58773394657944  | 18.75910791431981 |
| C | 6.01419130441858  | 11.19327446281953  | 19.74224560238274 |
| C | 5.48851682565873  | 9.77007793739730   | 18.07594119280332 |
| C | 6.48555146618170  | 10.841111168931777 | 17.56209155743612 |
| H | 6.00935805072447  | 11.55154279054394  | 16.87143550329406 |
| H | 7.41052027828996  | 10.43653577587442  | 17.12460728172655 |
| C | 6.00706941297575  | 8.30099776483311   | 18.03487590543506 |
| H | 4.54514993142261  | 9.82813557169816   | 17.50833320716369 |
| C | 7.30630727234765  | 8.15561854093982   | 18.84813395892141 |
| H | 7.65472811202569  | 7.10838876048460   | 18.83012573012424 |
| H | 7.14663609546928  | 8.43649850823804   | 19.90018662676940 |
| H | 8.12132855259047  | 8.78247423870561   | 18.44337346725440 |
| C | 4.92737419174689  | 7.36453617069685   | 18.61013298179947 |
| H | 5.27460562116382  | 6.31566206669788   | 18.58154134734334 |
| H | 3.99083647535687  | 7.43388370644379   | 18.02764214036510 |
| H | 4.68399855429023  | 7.62727690917917   | 19.65654513345953 |
| C | 6.25428639366204  | 7.92296878203579   | 16.55943986291501 |
| H | 7.04960296746653  | 8.53506308192094   | 16.09691355095989 |
| H | 5.33553865712328  | 8.04621797448163   | 15.95716203214114 |
| H | 6.56807200182852  | 6.86669279909721   | 16.48534828251532 |
| C | 6.10679548203821  | 7.31973759245566   | 22.26031096784333 |
| C | 7.18532401305821  | 6.42811630404683   | 22.21664707292259 |
| C | 8.50166334527760  | 6.91162392553700   | 22.30464252496925 |
| H | 9.75620499363189  | 8.66935285771535   | 22.51650253636760 |
| H | 9.34623123455324  | 6.21668185440797   | 22.25279215210035 |
| H | 5.07928406586081  | 6.95345092337835   | 22.15759579277393 |
| H | 7.00055967907282  | 5.35557066507219   | 22.09580205013044 |
| C | 4.64536242375417  | 9.39396093181183   | 26.53394442652993 |
| C | 3.30515824219112  | 9.73205368959254   | 26.78323383551776 |
| C | 2.45669242550519  | 10.07192375755660  | 25.71683866553102 |
| H | 2.29478305017913  | 10.30414991516969  | 23.55440270148741 |
| H | 2.91998514745839  | 9.72198750638516   | 27.80835325948386 |
| H | 1.40850384670283  | 10.32532367512722  | 25.90795941032653 |
| H | 6.18737959396861  | 9.14408159613316   | 25.02589897379470 |
| H | 5.30593825060969  | 9.12155781691829   | 27.36411005272814 |
| H | -0.52951949829738 | 12.43323246967131  | 17.66630218325726 |
| H | 0.87227257305116  | 13.36229073369384  | 17.09177376839953 |
| H | -0.08649513997127 | 13.15005829272420  | 20.02007640010707 |
| H | -0.19370328510800 | 14.56928102095648  | 18.97153032362477 |

Diallyl sulfone **3** (CASSCF geometry):

|   |                   |                   |                   |
|---|-------------------|-------------------|-------------------|
| S | 0.35747064753576  | 12.04890784237913 | 4.45274609365606  |
| C | 0.96921359870812  | 10.35332225159514 | 4.61292125419759  |
| C | -0.08715957591369 | 9.35937358010859  | 4.98894587084294  |
| H | 1.71660251981265  | 10.45651986571805 | 5.39248548790718  |
| H | 1.47023566550203  | 10.10504567836464 | 3.68793210067471  |
| C | -0.37569456851365 | 8.27640345461669  | 4.26574080469331  |
| H | -1.12576826008149 | 7.57845951982901  | 4.58701436746332  |
| H | 0.13695675315403  | 8.05269393925871  | 3.34734241030587  |
| H | -0.61496133549215 | 9.55456425714884  | 5.90456133176481  |
| C | -0.75518609814300 | 12.05369868601239 | 3.02555670720221  |
| C | -0.06709421972976 | 11.80454375966122 | 1.71800029078483  |
| H | -1.17608789996819 | 13.05252931988143 | 3.07180842896953  |
| H | -1.54109383078097 | 11.34036899976275 | 3.22995624329985  |
| C | -0.39300575416324 | 10.81342917733471 | 0.88699129827062  |
| H | 0.11298812785410  | 10.68749972715153 | -0.05165930004415 |
| H | -1.17869035457970 | 10.11547674786058 | 1.11475228689372  |
| H | 0.72113345536332  | 12.48846056253122 | 1.46113322243422  |
| O | 1.46868159647423  | 12.86412832143325 | 4.14244545328683  |
| O | -0.42613846703837 | 12.33948330935167 | 5.59168564739645  |

**TS5** (CASSCF geometry):

|   |                   |                   |                  |
|---|-------------------|-------------------|------------------|
| S | 0.40085373117997  | 12.19514996865006 | 4.56243209615286 |
| C | 0.91027586429646  | 10.46505387129021 | 4.82271532843759 |
| C | -0.12912939901855 | 9.44995618957432  | 4.46381421138742 |
| H | 1.15787087489592  | 10.45432919005805 | 5.87745783009860 |
| H | 1.81699014867493  | 10.33207155825919 | 4.25045162451345 |
| C | -0.11446125662132 | 8.88683004225812  | 3.14375309601298 |
| H | -0.77526753872419 | 8.04354622157732  | 3.01510864046526 |
| H | 0.87830739409482  | 8.65363613826484  | 2.78898130694913 |
| H | -1.03410077332474 | 9.43825159455407  | 5.04356860032879 |
| C | -0.60577926605623 | 12.24697923617163 | 3.04435628317084 |
| C | -0.13846247770467 | 11.33156308662311 | 1.95660009354837 |
| H | -0.54670035735281 | 13.29207634242614 | 2.76475573353949 |
| H | -1.61787528473193 | 12.02463366444052 | 3.35017400196510 |
| C | -0.70921529253207 | 10.01754814028603 | 1.87007274456733 |
| H | -0.45642500708716 | 9.48399444501731  | 0.96687879616239 |
| H | -1.77558510104928 | 10.00222058608154 | 2.03875779389005 |
| H | 0.82180427909187  | 11.53098771207896 | 1.51690591942578 |
| O | 1.58050218756863  | 12.93744054538528 | 4.32249226481139 |
| O | -0.45120072559964 | 12.55864046700272 | 5.63108363457301 |

**Diradical 10** (CASSCF geometry):

|   |                  |                   |                  |
|---|------------------|-------------------|------------------|
| S | 0.40818342766984 | 12.21983658625659 | 4.58086526286423 |
|---|------------------|-------------------|------------------|

|   |                   |                   |                  |
|---|-------------------|-------------------|------------------|
| C | 0.88697170113672  | 10.47512478850876 | 4.83910877206008 |
| C | -0.13368816289347 | 9.46931706656585  | 4.42658595997658 |
| H | 1.08913318758774  | 10.44702527675920 | 5.90298143144850 |
| H | 1.81576781977008  | 10.34885835482377 | 4.30059308486550 |
| C | -0.11849822643917 | 8.93290843400189  | 3.03409046368845 |
| H | -0.68609511589835 | 8.01139082002527  | 2.98046604074867 |
| H | 0.90268449770751  | 8.70322062420846  | 2.74569596415096 |
| H | -1.02855738482656 | 9.38857902689503  | 5.01574136055925 |
| C | -0.57696962867412 | 12.25562241863942 | 3.04198907317169 |
| C | -0.13742547320814 | 11.30022682403919 | 1.98482730540029 |
| H | -0.48125812648989 | 13.28901237437917 | 2.73145985088398 |
| H | -1.59724654475578 | 12.07315038531079 | 3.34914304141054 |
| C | -0.71865613429103 | 9.92630775850911  | 1.94576357006448 |
| H | -0.55702276891353 | 9.47774142366594  | 0.97267599888034 |
| H | -1.79129815985545 | 9.98232585169672  | 2.10401367189011 |
| H | 0.79179517818118  | 11.49689779443476 | 1.48254934534303 |
| O | 1.59959484267134  | 12.94732506697431 | 4.35799023383020 |
| O | -0.45501292847894 | 12.60003812430470 | 5.63381956876279 |

**TS6 (CASSCF geometry):**

|   |                   |                   |                  |
|---|-------------------|-------------------|------------------|
| S | 0.58426048914877  | 12.35495876344218 | 4.50347475798360 |
| C | 0.76563392818988  | 10.18130486682548 | 5.09195481162345 |
| C | -0.15998594651248 | 9.42240209794968  | 4.37620513782028 |
| H | 0.59656636250199  | 10.32883890722220 | 6.14403145178944 |
| H | 1.800707444840580 | 10.13126947297771 | 4.80054656995029 |
| C | 0.03424635958173  | 8.98307361572213  | 2.94693633743267 |
| H | -0.31044705558072 | 7.95965726376298  | 2.83005317355078 |
| H | 1.08957666995150  | 8.99981423159535  | 2.69437466840319 |
| H | -1.14674283923322 | 9.30090464306342  | 4.79030428136334 |
| C | -0.66944297370226 | 12.25927638132190 | 3.04486125557884 |
| C | -0.29590719873958 | 11.33734568348633 | 1.98731594397224 |
| H | -0.64482572990182 | 13.29879784264573 | 2.74391660126243 |
| H | -1.60237765951219 | 12.02773299958368 | 3.53861415339258 |
| C | -0.74655906850946 | 9.89843176778375  | 1.95273298187086 |
| H | -0.62878459206258 | 9.51017894972555  | 0.94726449698275 |
| H | -1.80620424055789 | 9.84520559164440  | 2.19206353014569 |
| H | 0.51176020755485  | 11.62974754427105 | 1.34217697505237 |
| O | 1.83900613209864  | 12.73824254004445 | 3.98013149055667 |
| O | 0.00192170687902  | 13.13772583693040 | 5.52340138126805 |

**Sulfur dioxide 4 (CASSCF geometry):**

|   |                   |                   |                  |
|---|-------------------|-------------------|------------------|
| S | -3.62364112086088 | 9.99412265880031  | 1.57930579067120 |
| O | -4.70117577514101 | 10.86278979112046 | 1.74069720788480 |
| O | -2.32783410399810 | 10.50543855007923 | 1.61323700144401 |

1,5-hexadiene **5** *s-trans* conformer (CASSCF geometry):

|   |                    |                   |                  |
|---|--------------------|-------------------|------------------|
| C | -15.79671254844809 | 19.62784833183823 | 2.98404282113774 |
| C | -16.10854780484172 | 18.62372954787715 | 3.80481048989501 |
| H | -15.57191840555579 | 18.45634844093010 | 4.72208513253682 |
| H | -16.90619760233716 | 17.94066568548304 | 3.57828494789632 |
| C | -14.70330151353748 | 20.63180019144333 | 3.22396409188588 |
| H | -16.36713246182979 | 19.75459070776224 | 2.07729946757165 |
| C | -15.22949687368783 | 22.06944426044722 | 3.32242535116545 |
| H | -13.98427289180937 | 20.57489476171194 | 2.40970332485138 |
| H | -14.16723501076640 | 20.37971289090769 | 4.13280289045238 |
| C | -14.13011201653164 | 23.07987992362649 | 3.49963412871804 |
| H | -15.93071462528147 | 22.14236719157724 | 4.14697388305967 |
| H | -15.78466885638515 | 22.30410778163848 | 2.41689961115932 |
| C | -13.99647089722293 | 23.89040246042062 | 4.55051422699967 |
| H | -13.18388120807869 | 24.58966271626021 | 4.62028707302750 |
| H | -14.69808713180210 | 23.87857246770140 | 5.36597415688129 |
| H | -13.39806015188434 | 23.12870364037456 | 2.70884840276185 |

1,5-hexadiene **5** *s-cis* conformer (CASSCF geometry):

|   |                    |                   |                  |
|---|--------------------|-------------------|------------------|
| C | -15.68653976135932 | 19.53485254034207 | 2.91030345122271 |
| C | -16.07556505807565 | 18.49759654443785 | 3.65259105748023 |
| H | -15.72746407734631 | 18.36209569363375 | 4.66146581224672 |
| H | -16.75301135350131 | 17.75664839380491 | 3.27033741630101 |
| C | -14.73606936898643 | 20.60945797614487 | 3.35432251631976 |
| H | -16.06844425656496 | 19.62665054639524 | 1.90575656337581 |
| C | -15.32376994067612 | 22.05287842299805 | 3.23202190863941 |
| H | -13.83765512477437 | 20.56585731554495 | 2.74424012383432 |
| H | -14.43015873003113 | 20.43251269217485 | 4.38071990170875 |
| C | -16.47597470048769 | 22.31219780864149 | 4.15967469480827 |
| H | -15.62793820321127 | 22.23047289141857 | 2.20522192412983 |
| H | -14.52352050888237 | 22.75480501251457 | 3.45137026514254 |
| C | -17.68490754794102 | 22.73238359195972 | 3.78534628159811 |
| H | -18.46491452136203 | 22.90809143128789 | 4.50282868024500 |
| H | -17.92672751931311 | 22.91121164147045 | 2.75244034263189 |
| H | -16.28632932748670 | 22.14385749723047 | 5.20804906031558 |

Complex **6** (DFT geometry):

|    |                  |                   |                  |
|----|------------------|-------------------|------------------|
| Pd | 0.07927074507815 | 12.24034209215000 | 4.78411487578694 |
| C  | 0.98737624049873 | 10.47646607889792 | 4.04983068535827 |
| C  | 2.44042841844212 | 10.54902689906720 | 4.22629879054284 |
| H  | 0.71087825698903 | 10.40787755416243 | 2.99840450241430 |
| H  | 0.54566747387074 | 9.64032251554081  | 4.59975977259049 |

|   |                   |                   |                  |
|---|-------------------|-------------------|------------------|
| C | 3.17662577961688  | 9.84159617958571  | 5.09058883555017 |
| H | 4.24780890534539  | 9.98346219240712  | 5.17233966173592 |
| H | 2.73134801748205  | 9.07581996188833  | 5.71889764028128 |
| H | 2.95871163764078  | 11.27331721591301 | 3.59835875875198 |
| C | -0.79324085380584 | 12.44442649771748 | 2.87333634375677 |
| C | -1.94149070267777 | 11.53341106414385 | 2.86434867716505 |
| H | -0.00966429106172 | 12.15628410817079 | 2.17256211095283 |
| H | -1.09546173546794 | 13.47322200707576 | 2.65443780311373 |
| C | -3.22934939335106 | 11.88770445980430 | 2.86670559139197 |
| H | -4.02093367191159 | 11.14865339337686 | 2.89366506031577 |
| H | -3.53058322129562 | 12.93072270943176 | 2.82746785583406 |
| H | -1.70572752994073 | 10.47042058202333 | 2.88533307434274 |
| P | 1.09346684459823  | 11.85552288337293 | 6.81222582254403 |
| H | 0.55186857467733  | 12.34191645956828 | 8.02682485359925 |
| H | 2.40201811674024  | 12.34934530548531 | 6.98830787448621 |
| P | -1.07989145466214 | 14.14898132118945 | 5.28314080492867 |
| H | -0.73606625002045 | 15.33916581156848 | 4.60491672654225 |
| H | -1.23538212746898 | 14.72404685299512 | 6.56754049077189 |
| H | -2.44541651098712 | 14.11464659351614 | 4.93066677937947 |
| H | 1.33363873167130  | 10.52912926094729 | 7.22294660786298 |

**TS3 (DFT geometry):**

|    |                   |                   |                  |
|----|-------------------|-------------------|------------------|
| Pd | 0.01113171305548  | 12.21034771325277 | 4.97185032297384 |
| C  | 0.77225811597929  | 10.15236816099254 | 4.68440370282270 |
| C  | -0.37432481351280 | 9.38428327903291  | 4.34750276050131 |
| H  | 1.16612083673174  | 9.94412653997201  | 5.67851117699016 |
| H  | 1.56393235397139  | 10.16565008802084 | 3.93660486351538 |
| C  | -0.60121222050714 | 8.85879934033455  | 3.10227283449459 |
| H  | -1.45229322131086 | 8.20879942613711  | 2.93663486261553 |
| H  | 0.23673208033970  | 8.71666867730399  | 2.43269389153903 |
| H  | -1.13363402189388 | 9.25053756002476  | 5.11490928693610 |
| C  | -0.89083686152788 | 12.48872498528177 | 2.94801589121881 |
| C  | -0.55230603276640 | 11.51891184426245 | 1.98257840485364 |
| H  | -0.40035653781427 | 13.45523823816321 | 2.82207401895074 |
| H  | -1.95786942205163 | 12.58125543512562 | 3.14641523888302 |
| C  | -1.32370255834951 | 10.42557827414071 | 1.69928705206514 |
| H  | -1.09064028669049 | 9.79193104223490  | 0.85324367660134 |
| H  | -2.34984155928286 | 10.39379939465763 | 2.04875907271849 |
| H  | 0.43327966408528  | 11.58615368174376 | 1.52587085810883 |
| P  | 1.45982983271885  | 12.23844373014170 | 6.76221476344352 |
| H  | 1.73106129723849  | 13.35453493879111 | 7.59373169429537 |
| H  | 2.80996390752327  | 11.89290266161511 | 6.51904896618760 |
| P  | -1.29019313610133 | 14.02900454710556 | 5.55725279918838 |
| H  | -1.98975955039876 | 14.78899946729273 | 4.58758757291786 |
| H  | -0.79745476198389 | 15.13368438256653 | 6.29475911975046 |

|   |                   |                   |                  |
|---|-------------------|-------------------|------------------|
| H | -2.40169829440476 | 13.78959376964220 | 6.40063999653779 |
| H | 1.26292447695297  | 11.31429182216338 | 7.81641917189033 |

Complex **8** (DFT geometry):

|    |              |              |             |
|----|--------------|--------------|-------------|
| Pd | 0.657933000  | 11.679009000 | 4.737666000 |
| C  | 1.698178000  | 9.876625000  | 4.157083000 |
| C  | 0.333515000  | 9.623995000  | 4.051212000 |
| C  | -0.330974000 | 9.442738000  | 2.713570000 |
| C  | -2.844675000 | 12.267528000 | 2.457843000 |
| C  | -1.769891000 | 11.498986000 | 2.332836000 |
| C  | -1.733807000 | 10.017557000 | 2.557662000 |
| P  | -1.323849000 | 12.569977000 | 5.450213000 |
| H  | -1.823696000 | 13.786824000 | 4.932171000 |
| H  | -1.392156000 | 12.962762000 | 6.811908000 |
| P  | 2.283511000  | 13.247625000 | 5.049504000 |
| H  | 3.609515000  | 12.914471000 | 5.422062000 |
| H  | 2.181821000  | 14.342637000 | 5.944597000 |
| H  | 2.660053000  | 14.036369000 | 3.934902000 |
| H  | -2.568254000 | 11.895682000 | 5.437174000 |
| H  | 0.312537000  | 9.862698000  | 1.932192000 |
| H  | -0.379655000 | 8.364366000  | 2.513602000 |
| H  | -2.352512000 | 9.752555000  | 3.421935000 |
| H  | -2.204777000 | 9.536054000  | 1.691810000 |
| H  | 2.254462000  | 9.573888000  | 5.038302000 |
| H  | 2.291243000  | 10.021748000 | 3.258807000 |
| H  | -0.164990000 | 9.128616000  | 4.882214000 |
| H  | -0.839156000 | 11.951142000 | 1.993226000 |
| H  | -3.796908000 | 11.865959000 | 2.792237000 |
| H  | -2.812845000 | 13.326388000 | 2.229180000 |

Complex **7** (DFT geometry):

|    |              |              |             |
|----|--------------|--------------|-------------|
| Pd | 0.380448000  | 12.744188000 | 4.779333000 |
| O  | 1.892361000  | 11.900846000 | 3.692626000 |
| C  | 2.251072000  | 10.683518000 | 3.993171000 |
| C  | 1.639877000  | 9.801885000  | 4.809921000 |
| H  | 2.069076000  | 8.821132000  | 4.966648000 |
| H  | 0.668336000  | 10.012649000 | 5.247214000 |
| H  | 3.182102000  | 10.374345000 | 3.503113000 |
| C  | -0.635097000 | 12.896518000 | 2.967200000 |
| C  | -1.256627000 | 11.585853000 | 2.764604000 |
| H  | 0.229088000  | 13.074301000 | 2.326707000 |
| H  | -1.351176000 | 13.718607000 | 2.887939000 |
| C  | -2.570655000 | 11.353016000 | 2.724079000 |
| H  | -2.965296000 | 10.352750000 | 2.592587000 |

|   |              |              |             |
|---|--------------|--------------|-------------|
| H | -3.292880000 | 12.161263000 | 2.800424000 |
| H | -0.570130000 | 10.747830000 | 2.665201000 |
| P | 1.683456000  | 12.411023000 | 6.708921000 |
| H | 1.867871000  | 13.496400000 | 7.599412000 |
| H | 3.031847000  | 12.069456000 | 6.509617000 |
| P | -1.405236000 | 13.742036000 | 5.588077000 |
| H | -1.689776000 | 15.063770000 | 5.183968000 |
| H | -1.623300000 | 13.913976000 | 6.973713000 |
| H | -2.634090000 | 13.138571000 | 5.250521000 |
| H | 1.345167000  | 11.448996000 | 7.681815000 |

**TS4** (DFT geometry):

|    |                   |                   |                  |
|----|-------------------|-------------------|------------------|
| Pd | -0.42148010307612 | 12.28899351558105 | 5.05611409811586 |
| O  | -0.33619048955232 | 10.09867979358262 | 5.20609987120670 |
| C  | -0.86923018864008 | 9.27995418789769  | 4.39162673609982 |
| C  | -0.22561902031017 | 8.73590931428709  | 3.31105378975747 |
| H  | -0.70184378250186 | 7.94853193754419  | 2.73936674824975 |
| H  | 0.84553161636951  | 8.86027431410283  | 3.21099342441497 |
| H  | -1.94758530314093 | 9.07613137569856  | 4.49874175688810 |
| C  | -1.41993821436898 | 12.46250460969018 | 3.18294361293458 |
| C  | -0.51845548088304 | 11.69452106765484 | 2.38391582401475 |
| H  | -1.46280328531489 | 13.52260948059490 | 2.93475269149549 |
| H  | -2.41831042423060 | 12.04080848757141 | 3.30314501709100 |
| C  | -0.79329684057973 | 10.43442785577553 | 1.91384559090135 |
| H  | -0.13962331560175 | 9.98102392974632  | 1.17943431793478 |
| H  | -1.81349641639443 | 10.07382367181423 | 1.91692407591945 |
| H  | 0.43907696749224  | 12.14203168082447 | 2.13092514043255 |
| P  | 1.11667665599999  | 11.80054875973404 | 6.81502225150353 |
| H  | 1.80302143255638  | 12.69905059463158 | 7.66910247239854 |
| H  | 2.23063189066872  | 11.00919622467464 | 6.46565740162336 |
| P  | -0.92711892390812 | 14.42601859349280 | 5.33445694675466 |
| H  | -2.26948429316828 | 14.84792103508812 | 5.18845751337222 |
| H  | -0.37143835265767 | 15.36107593095086 | 4.43039026276634 |
| H  | -0.64554764017274 | 15.15348553886600 | 6.51548690427186 |
| H  | 0.60652451141489  | 10.95903110019524 | 7.82436455185259 |

**Complex 9** (DFT geometry):

|    |              |              |             |
|----|--------------|--------------|-------------|
| Pd | 0.620551000  | 11.665836000 | 4.708215000 |
| C  | 1.696455000  | 9.886430000  | 4.136185000 |
| C  | 0.337627000  | 9.610350000  | 4.006925000 |
| C  | -0.308627000 | 9.439800000  | 2.659423000 |
| O  | -2.795237000 | 12.109777000 | 2.661298000 |
| C  | -1.805237000 | 11.458521000 | 2.448569000 |
| C  | -1.730314000 | 9.962832000  | 2.560176000 |

|   |              |              |             |
|---|--------------|--------------|-------------|
| P | -1.328150000 | 12.659139000 | 5.393693000 |
| H | -1.788027000 | 13.845189000 | 4.779886000 |
| H | -1.331890000 | 13.155154000 | 6.720006000 |
| P | 2.261354000  | 13.216380000 | 5.083376000 |
| H | 3.557119000  | 12.859212000 | 5.530186000 |
| H | 2.130867000  | 14.323782000 | 5.958431000 |
| H | 2.709114000  | 13.979585000 | 3.978248000 |
| H | -2.595380000 | 12.034386000 | 5.457779000 |
| H | 0.308458000  | 9.929778000  | 1.897040000 |
| H | -0.307092000 | 8.372619000  | 2.405346000 |
| H | -2.353211000 | 9.640936000  | 3.399011000 |
| H | -2.213911000 | 9.576462000  | 1.652550000 |
| H | 2.243675000  | 9.579074000  | 5.021307000 |
| H | 2.301209000  | 10.049600000 | 3.248778000 |
| H | -0.166116000 | 9.098778000  | 4.824825000 |
| H | -0.872408000 | 11.948189000 | 2.088728000 |

### References

- 
- (1) (a) Neese, F. The ORCA Program System. *Wiley Interdisciplinary Reviews: Computational Molecular Science* **2012**, *2*, 73–78. (b) Neese, F. Software Update: The ORCA Program System, Version 4.0. *Wiley Interdisciplinary Reviews: Computational Molecular Science* **2018**, *8*, e1327.
- (2) Weigend, F.; Ahlrichs, R. Balanced Basis Sets of Split Valence, Triple Zeta Valence and Quadruple Zeta Valence Quality for H to Rn: Design and Assessment of Accuracy. *Phys. Chem. Chem. Phys.* **2005**, *7*, 3297–3305.
- (3) Adamo, C.; Barone, V. Toward Reliable Density Functional Methods without Adjustable Parameters: The PBE0 Model. *J. Chem. Phys.* **1999**, *110*, 6158–6170.
- (4) (a) Grimme, S.; Antony, J.; Ehrlich, S.; Krieg, H. A consistent and accurate *ab initio* parametrization of density functional dispersion correction (DFT-D) for the 94 elements H-Pu. *J. Chem. Phys.* **2010**, *132*, 154104. (b) Grimme, S.; Ehrlich, S.; Goerigk, L. *J. Comput. Chem.* **2011**, *32*, 1456–1465. (c) Becke, A. D.; Johnson, E. R. A density-functional model of the dispersion interaction. *J. Chem. Phys.* **2005**, *122*, 154101. (d) Johnson, E. R.; Becke, A. D. A post-Hartree–Fock model of intermolecular interactions. *J. Chem. Phys.* **2005**, *123*, 024101. (e) Johnson, E. R.; Becke, A. D. A post-Hartree-Fock model of intermolecular interactions: Inclusion of higher-order corrections. *J. Chem. Phys.* **2006**, *124*, 174104.



- 
- (5) Andrae, D.; Häußermann, U.; Dolg, M.; Stoll, H.; Preuß, H. Energy-Adjusted *ab Initio* Pseudopotentials for the Second and Third Row Transition Elements. *Theoret. Chim. Acta* **1990**, *77*, 123–141.
- (6) (a) Angeli, C.; Cimiraglia, R.; Evangelisti, S.; Leininger, T.; Malrieu, J.-P. Introduction of N-Electron Valence States for Multireference Perturbation Theory. *J. Chem. Phys.* **2001**, *114*, 10252–10264. (b) Angeli, C.; Cimiraglia, R.; Malrieu, J.-P. N-Electron Valence State Perturbation Theory: A Fast Implementation of the Strongly Contracted Variant. *Chemical Physics Letters* **2001**, *350*, 297–305. (c) Angeli, C.; Cimiraglia, R.; Malrieu, J.-P. N-Electron Valence State Perturbation Theory: A Spinless Formulation and an Efficient Implementation of the Strongly Contracted and of the Partially Contracted Variants. *J. Chem. Phys.* **2002**, *117*, 9138–9153.
- (7) Nakano, H. Quasidegenerate Perturbation Theory with Multiconfigurational Self-consistent-field Reference Functions. *J. Chem. Phys.* **1993**, *99*, 7983–7992.
- (8) Marenich, A. V.; Cramer, C. J.; Truhlar, D. G. Universal Solvation Model Based on Solute Electron Density and on a Continuum Model of the Solvent Defined by the Bulk Dielectric Constant and Atomic Surface Tensions. *J. Phys. Chem. B* **2009**, *113*, 6378–6396.
- (9) Grimme, S. Supramolecular Binding Thermodynamics by Dispersion-Corrected Density Functional Theory. *Chemistry – A European Journal* **2012**, *18*, 9955–9964.
- (10) Neese, F.; Wennmohs, F.; Hansen, A.; Becker, U. Efficient, Approximate and Parallel Hartree-Fock and Hybrid DFT Calculations. A ‘Chain-of-Spheres’ Algorithm for the Hartree-Fock Exchange. *Chemical Physics* **2009**, *356*, 98–109.
- (11) Stoychev, G. L.; Auer, A. A.; Neese, F. Automatic Generation of Auxiliary Basis Sets. *J. Chem. Theory Comput.* **2017**, *13*, 554–562.
- (12) Woodward, R. B.; Hoffmann R.; *The Conservation of Orbital Symmetry*; Verlag Chemie GmbH (BRD) and Academic Press Inc. (USA), 1971.
- (13) Cusumano, A. Q.; Stoltz, B. M.; Goddard, W. A. III Reaction Mechanism, Origins of Enantioselectivity, and Reactivity Trends in Asymmetric Allylic Alkylation: A Comprehensive Quantum Mechanics Investigation of a C(sp<sup>3</sup>)-C(sp<sup>3</sup>) Cross-Coupling. *J. Am. Chem. Soc.* **2020**, *142*, 13917–13933.
- (14) For PBE see: (a) Perdew, J. P.; Burke, K.; Ernzerhof, M. Generalized Gradient Approximation Made Simple. *Phys. Rev. Lett.* **1996**, *77*, 3865–3868. For M06-2X see (b) Zhao, Y.; Truhlar, D. G. The M06 Suite of Density Functionals for Main Group Thermochemistry, Thermochemical Kinetics,

---

Noncovalent Interactions, Excited States, and Transition Elements: Two New Functionals and Systematic Testing of Four M06-Class Functionals and 12 Other Functionals. *Theor Chem Account* **2008**, *120*, 215–241.

(15) Heisenberg, W. Zur Theorie des Ferromagnetismus. *Z. Physik* **1928**, *49*, 619–636.

(16) Neese, F. Definition of Corresponding Orbitals and the Diradical Character in Broken Symmetry DFT Calculations on Spin Coupled Systems. *Journal of Physics and Chemistry of Solids* **2004**, *65*, 781–785.

(17) (a) Yamaguchi, K.; Takahara, Y.; Fueno, T. Ab-Initio Molecular Orbital Studies of Structure and Reactivity of Transition Metal-OXO Compounds. In *Applied Quantum Chemistry*; Smith, V. H., Schaefer, H. F., Morokuma, K., Eds.; Springer Netherlands: Dordrecht, 1986; pp 155–184. (b) (b) Soda, T.; Kitagawa, Y.; Onishi, T.; Takano, Y.; Shigeta, Y.; Nagao, H.; Yoshioka, Y.; Yamaguchi, K. Ab Initio Computations of Effective Exchange Integrals for H–H, H–He–H and Mn<sub>2</sub>O<sub>2</sub> Complex: Comparison of Broken-Symmetry Approaches. *Chemical Physics Letters* **2000**, *319*, 223–230. (c) Ferré, N.; Guihéry, N.; Malrieu, J.-P. Spin Decontamination of Broken-Symmetry Density Functional Theory Calculations: Deeper Insight and New Formulations. *Phys. Chem. Chem. Phys.* **2015**, *17*, 14375–14382.

(18) (a) Miralles, J.; Castell, O.; Caballol, R.; Malrieu, J.-P. Specific CI Calculation of Energy Differences: Transition Energies and Bond Energies. *Chemical Physics* **1993**, *172*, 33–43. For discussion on the iterative method (IDDCI) see: (b) García, V. M.; Castell, O.; Caballol, R.; Malrieu, J. P. An Iterative Difference-Dedicated Configuration Interaction. Proposal and Test Studies. *Chemical Physics Letters* **1995**, *238*, 222–229.

(19) (a) Schleyer, P. von R.; Maerker, C.; Dransfeld, A.; Jiao, H.; van Eikema Hommes, N. J. R. Nucleus-Independent Chemical Shifts: A Simple and Efficient Aromaticity Probe. *J. Am. Chem. Soc.* **1996**, *118*, 6317–6318. For a general review of the concept and applications of NICS, see: (b) Chen, Z.; Wannere, C. S.; Corminboeuf, C.; Puchta, R.; Schleyer, P. von R. Nucleus-Independent Chemical Shifts (NICS) as an Aromaticity Criterion. *Chem. Rev.* **2005**, *105*, 3842–3888. For discussion on NICS analysis of transition states, see: (c) Schleyer, P. von R.; Wu, J. I.; Cossío, F. P.; Fernández, I. Aromaticity in Transition Structures. *Chem. Soc. Rev.* **2014**, *43*, 4909–4921. (d) Jiao, H.; Schleyer, P. von R. Aromaticity of Pericyclic Reaction Transition Structures: Magnetic Evidence. *Journal of Physical Organic Chemistry* **1998**, *11*, 655–662.

- 
- (20) (a) Knizia, G. Intrinsic Atomic Orbitals: An Unbiased Bridge between Quantum Theory and Chemical Concepts. *J. Chem. Theory Comput.* **2013**, *9*, 4834–4843. (b) Knizia, G.; Klein, J. E. M. N. Electron Flow in Reaction Mechanisms—Revealed from First Principles. *Angew. Chem. Int. Ed.* **2015**, *54*, 5518–5522. (c) Klein, J. E. M. N.; Knizia, G. CPCET versus HAT: A Direct Theoretical Method for Distinguishing X–H Bond-Activation Mechanisms. *Angew. Chem. Int. Ed.* **2018**, *57*, 11913–11917.
- (21) Knizia, G. *IboView*; see <http://www.iboview.org>.
